# Supplementary material for: Capturing complex tumour biology in vitro: histological and molecular characterisation of precision cut slices
Source: PubMed Central journal article supplement (PMC4673528; doi:10.1038/srep17187), 2015-12-09
Supplement: srep17187-s1.pdf [file srep17187-s1.pdf]

# Capturing complex tumour biology *in vitro*: histological and molecular characterisation of precision cut slices

## Authors:

The PREDECT Consortium - Tissue Slice Platform\*

\*Emma J. Davies<sup>1‡</sup>, Meng Dong<sup>2‡</sup>, Matthias Gutekunst<sup>2‡</sup>, Katja Närhi<sup>3‡</sup>, Hanneke J. A. A. van Zoggel<sup>4‡</sup>, Sami Blom<sup>3</sup>, Taija M. af Hällström<sup>3</sup>, Ashwini Nagaraj<sup>3</sup>, Tauno Metsalu<sup>5</sup>, Eva Oswald<sup>6</sup>, Sigrun Erkens-Schulze<sup>4</sup>, Juan A. Delgado San Martin<sup>1</sup>, Riku Turkki<sup>3</sup>, Stephen R. Wedge<sup>1#</sup>, Julia Schueler<sup>6#</sup>, Wytske van Weerden<sup>4#</sup>, Emmy W Verschuren<sup>3#†</sup>, Simon T. Barry<sup>1#</sup>, Heiko van der Kuip<sup>2#</sup> and John A. Hickman<sup>7†</sup>,

† Consortium Coordinators

‡ Contributed equally to this work

# Senior Team Members

\*[www.predect.eu](http://www.predect.eu)

<sup>1</sup>Oncology iMed, Bioscience, AstraZeneca, Alderley Park, Macclesfield, SK10 4TG, United Kingdom;

<sup>2</sup>Institute for Molecular Medicine Finland (FIMM); <sup>3</sup>Dr Margarete Fischer-Bosch Institute of Clinical Pharmacology and University of Tuebingen, Auerbachstrasse 112, 70376 Stuttgart, Germany;

University of Helsinki; Helsinki, Finland <sup>4</sup>Department of Urology, Erasmus MC Rotterdam, PO Box 2040, 3000 CA Rotterdam, The Netherlands; <sup>5</sup> Institute of Computer Science, University of Tartu, J. Liivi 2, 50409, Tartu, Estonia, <sup>6</sup> Oncotest GmbH, Am Flughafen 12-14, 79108 Freiburg, Germany;

<sup>7</sup>Institut de Recherches Servier c/o 126 boulevard Pereire, 75017 Paris, France.

**a** MCF-7 CDX – 48h

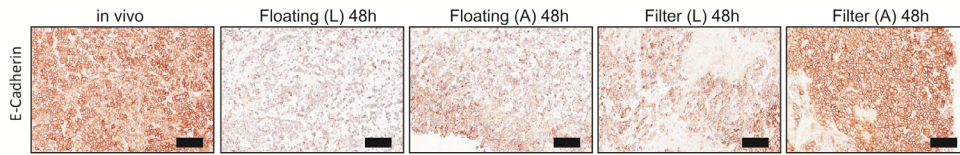

**b** MCF-7 CDX – 48h

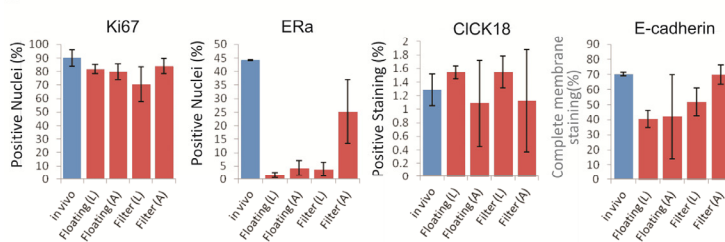

**c** H1437 CDX – 72h

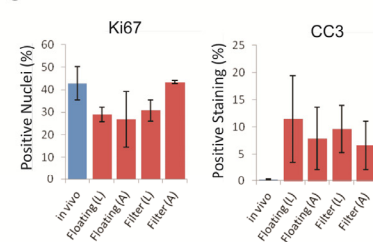

**d** 1647 PDX – 72h

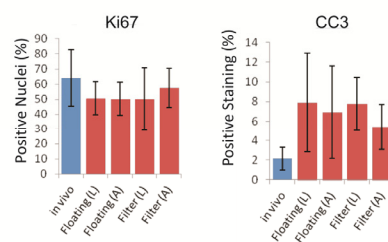

**e** PC295 PDX – 48h

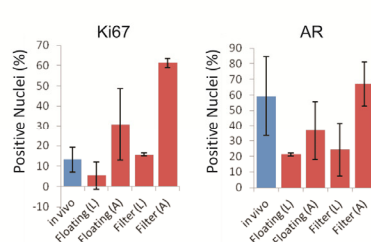

**f** MCF-7 CDX – 48h

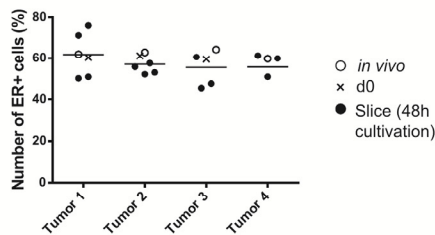

**g** ERα - Patient Breast Tumour

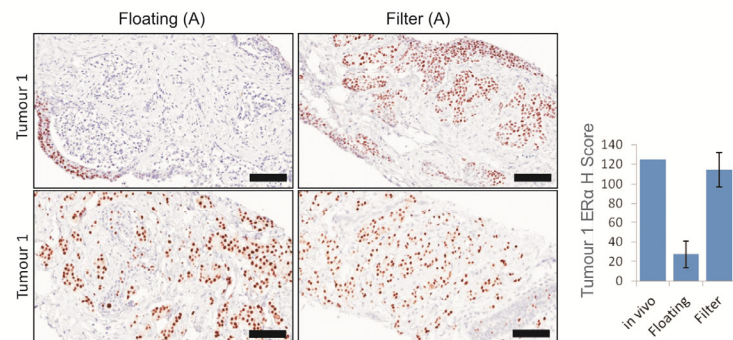

Supplementary Figure 1: **Changes in biomarkers according to culture condition.** (a) E-cadherin stained MCF-7 tumour tissue slice sections: retention of complete membranous staining is only observed in tumour slices cultivated on filter supports in atmospheric oxygen. Scale bars represent 100µm. (b-e) Histograms of the quantification of immunohistochemical staining for each of the biomarkers used to generate the heatmaps for each tumour type in Figure 2. Values reflect the means from three independent experiments, error bars represent standard deviations. (f) The total percentage of ER positive cells was quantified in the *in vivo* tumour, the day 0 (d0) samples and in slices cultivated for 48h. Levels of ER positive cells were similar to that found *in vivo*. (g) Slices from two patient breast tumours were cultivated with and without a filter support. Cultivation without a filter support caused a significant loss of ERα positive cells in slices from tumour 1 but had no effect on ERα positive cells in slices from tumour 2. Scale bars represent 100µm.

**a**

| oxygen level     |    | A | L | A  | L  |   | A  | L  | A  | L  |
|------------------|----|---|---|----|----|---|----|----|----|----|
| filter-support   | d0 | + | + | -  | -  |   | +  | +  | -  | -  |
| breast MCF-7 CDX | 0  | 6 | 4 | nd | nd | 0 | 22 | 16 | nd | nd |

**upregulated**                      **downregulated**

**b** MCF-7 CDX

| oxygen level       | A | L | A  | L  | A  | L | A  | L  |
|--------------------|---|---|----|----|----|---|----|----|
| filter-support     | + | + | -  | -  | +  | + | -  | -  |
| apoptosis          | 1 | 0 | nd | nd | 4  | 1 | nd | nd |
| cell cycle         | 0 | 2 | nd | nd | 10 | 6 | nd | nd |
| DDR                | 1 | 0 | nd | nd | 5  | 4 | nd | nd |
| necrosis/autophagy | 0 | 0 | nd | nd | 0  | 0 | nd | nd |
| NFkB               | 0 | 0 | nd | nd | 1  | 2 | nd | nd |
| p38/JNK            | 0 | 0 | nd | nd | 2  | 1 | nd | nd |
| ROS                | 2 | 0 | nd | nd | 0  | 1 | nd | nd |
| UPR/ER stress      | 2 | 2 | nd | nd | 0  | 1 | nd | nd |

**c** MCF-7 CDX – Filter, Low Oxygen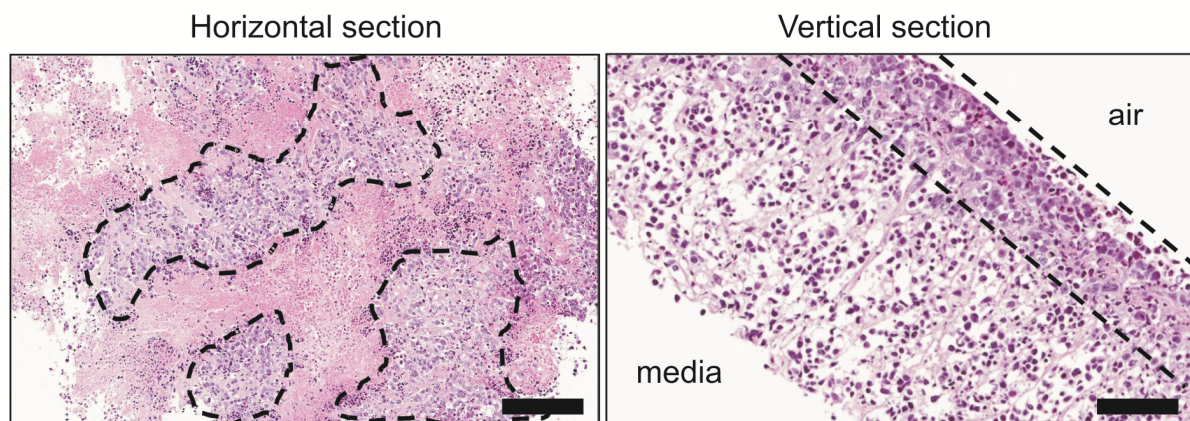

Supplementary Figure 2: **Stress biomarker changes in MCF-7 tumour slices.** (a) Total numbers of differentially expressed stress transcripts in MCF-7 tumour slices cultivated on filters in atmospheric and low oxygen conditions. Insufficient RNA could be extracted from MCF-7 tumour slices cultivated under floating conditions. (b) Table of the numbers of differentially expressed genes (DEGs) and their associated functions in MCF-7 tumour slices. Results are from three independent experiments. (c) H&E stained sections of MCF-7 tumour slices cultivated on filters under conditions of low oxygen; dashed line indicates areas of viable cells. Scale bars represent 100µm.

**a Biomarker changes in lung and prostate models under optimal culture conditions**

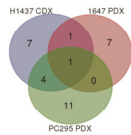

**b Details of changes under optimal culture conditions**

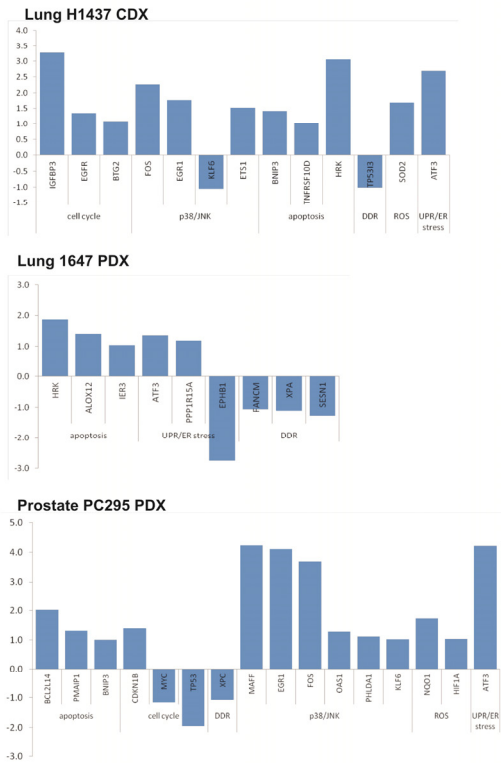

**c Biomarker changes in lung and prostate models under suboptimal culture conditions**

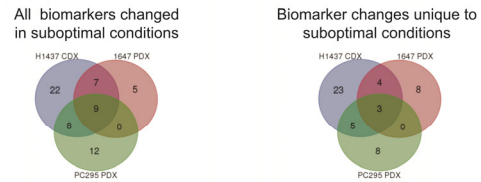

**d Details of changes unique to suboptimal culture conditions**

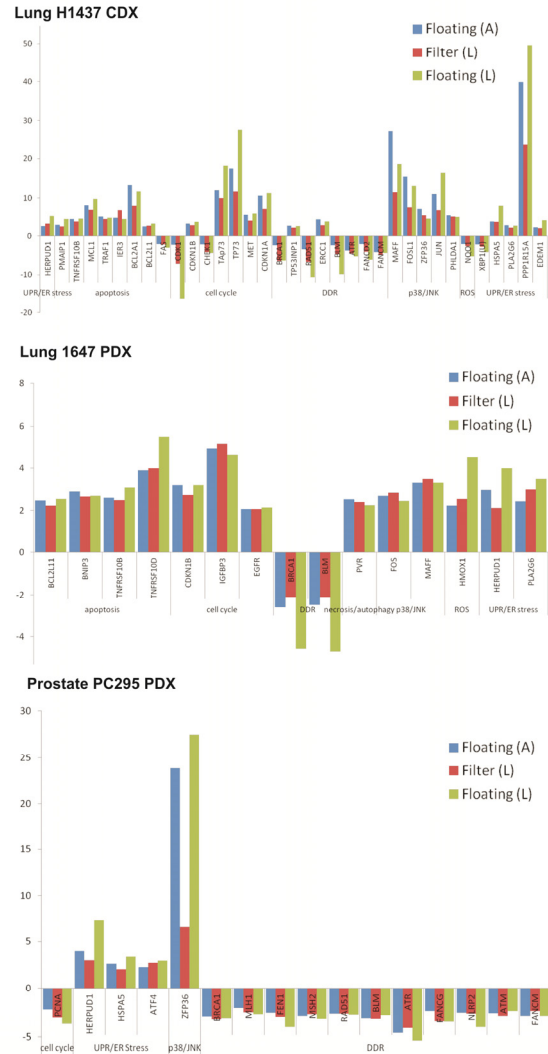

Supplementary Figure 3: **Stress biomarker changes for each model cultivated under either optimal or suboptimal conditions.** The fold-changes in transcriptional biomarkers observed in slices from MCF-7, PC295, H1437 and LXFA 1647 xenografts after cultivation. Red indicates significantly up-regulated genes and green indicates down-regulated genes ( $p < 0.05$ ). (a) Venn diagram showing the stress gene transcripts deregulated in three xenograft models. (b) Details of the individual changes shown in the Venn diagram. (c) Venn diagrams of all biomarker changes observed under suboptimal conditions (floating and low oxygen conditions) and those unique to suboptimal conditions of slice culture. (d) Details of the individual changes in slices from three xenograft models unique to suboptimal conditions. Results are from three independent experiments.

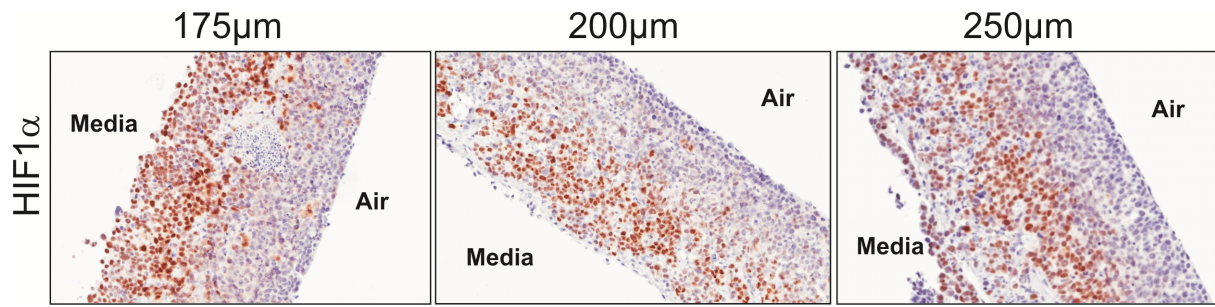

Supplementary Figure 4: **HIF1 $\alpha$  expression in slices of varying thicknesses.** Generation of a gradient of HIF1 $\alpha$  expression after 24h in slices of MCF-7 CDX cut at 175 to 250 $\mu$ m and incubated under optimal conditions (filter support, incubation in air, on Millicell Cell Culture inserts (see Methods)).

Supplementary Table 1: A list of the transcripts analysed and their functional classification.

| Gene names | Assay (Applied) | Functional Gene Grouping            | Upstream pathway/transcription factor                     | Refs # |
|------------|-----------------|-------------------------------------|-----------------------------------------------------------|--------|
| ABCB1      | Hs00184500_m1   | Drug transporter                    | p53/NFkB                                                  | 1      |
| ACTB       | Hs03023943_g1   | housekeeping gene                   |                                                           |        |
| AIFM2      | Hs01097299_m1   | apoptosis                           | p53                                                       | 2      |
| ALOX12     | Hs00911144_m1   | apoptosis                           | NFkB                                                      | 3      |
| APAF1      | Hs00559440_m1   | apoptosis                           | p53                                                       | 4      |
| ATF2       | Hs01099617_m1   | UPR/ER stress                       | target of stress regulated miR-451                        | 5      |
| ATF3       | Hs00231069_m1   | UPR/ER stress                       | p53/p38                                                   | 6      |
| ATF4       | Hs00909569_g1   | UPR/ER Stress                       | UPR target gene                                           | 7      |
| ATF6       | Hs00232586_m1   | UPR/ER Stress                       | UPR transcription factor                                  | 8      |
| ATG12      | Hs01047860_g1   | necrosis/autophagy                  | target of ATF4                                            | 9      |
| ATG5       | Hs01555465_m1   | necrosis/autophagy                  | induced by DNA damage                                     | 10     |
| ATG7       | Hs00197348_m1   | necrosis/autophagy                  | target of miR17                                           | 11     |
| ATM        | Hs00175892_m1   | DNA damage and repair               | BRCA1/E2F1/CtIP                                           | 12     |
| ATR        | Hs00992132_m1   | DNA damage and repair               | target of stress regulated miR-185                        | 13     |
| BAK1       | Hs00832876_g1   | apoptosis                           | p53                                                       | 14     |
| BCL2       | Hs01048932_g1   | apoptosis                           | NFkB/p53                                                  | 15, 16 |
| BCL2A1     | Hs03405589_m1   | apoptosis                           | p53/NFkB                                                  | 17, 18 |
| BCL2L1     | Hs01067345_g1   | apoptosis                           | NFkB                                                      | 19     |
| BCL2L11    | Hs01083836_m1   | apoptosis                           | NFkB                                                      | 20     |
| BCL2L13    | Hs00209787_m1   | apoptosis                           | prosurvival signals and oncogenes                         |        |
| BCL2L14    | Hs00373302_m1   | apoptosis                           | p53                                                       | 21     |
| BECN1      | Hs01011594_g1   | necrosis/autophagy                  | NFkB                                                      | 22     |
| BID        | Hs00609632_m1   | apoptosis                           | p53                                                       | 23     |
| BIK        | Hs00154189_m1   | apoptosis                           | DNA damage/cytokines                                      | 24     |
| BIRC2      | Hs01112284_m1   | apoptosis                           | NFkB                                                      | 25     |
| BLM        | Hs01119886_g1   | DNA damage and repair               | prosurvival signals and oncogenes                         | 26     |
| BNIP3      | Hs00969289_m1   | apoptosis                           | NFkB                                                      | 27     |
| BOK        | Hs00261296_m1   | apoptosis                           | p53                                                       | 28     |
| BRCA1      | Hs01556185_m1   | DNA damage and repair               | regulated by specific factors binding single-stranded DNA | 29     |
| BTG2       | Hs00198887_m1   | proliferation/cell cycle regulation | p53                                                       | 17     |

|        |               |                                     |                                                    |         |
|--------|---------------|-------------------------------------|----------------------------------------------------|---------|
| CCNA2  | Hs00153138_m1 | proliferation/cell cycle regulation | p53                                                | 30      |
| CCNB1  | Hs01030097_m1 | proliferation/cell cycle regulation | p53                                                | 31      |
| CCNG1  | Hs00171112_m1 | proliferation/cell cycle regulation | p53                                                | 32      |
| CCNK   | Hs01083210_m1 | proliferation/cell cycle regulation | p53                                                | 33      |
| CDC25C | Hs00156411_m1 | proliferation/cell cycle regulation | p53                                                | 34      |
| CDK1   | Hs00364293_m1 | proliferation/cell cycle regulation | p53                                                | 35      |
| CDKN1A | Hs99999142_m1 | proliferation/cell cycle regulation | p53/NFkB                                           | 17 36 , |
| CDKN1B | Hs00153277_m1 | proliferation/cell cycle regulation | prosurvival signals and oncogenes                  | 37      |
| CFLAR  | Hs01116281_m1 | apoptosis                           | NFkB                                               | 38      |
| CHEK1  | Hs00967510_g1 | proliferation/cell cycle regulation | NF-Y-p53                                           | 39      |
| DDB2   | Hs03044953_m1 | DNA damage and repair               | p53/BRCA1/AP1                                      | 17      |
| DNAJC3 | Hs00534489_m1 | UPR/ER Stress                       | UPR target gene                                    | 40      |
| EDEM1  | Hs00976004_m1 | UPR/ER Stress                       | UPR target gene                                    | 40      |
| EDEM2  | Hs01076556_m1 | UPR/ER Stress                       | UPR target gene                                    | 41      |
| EGFR   | Hs01076078_m1 | proliferation/cell cycle regulation | p53/NFkB                                           | 42 16 , |
| EGR1   | Hs00152928_m1 | p38/JNK                             | NFkB/p38                                           | 43 44 , |
| EPHB1  | Hs01057855_m1 | UPR/ER Stress                       | UPR target gene                                    |         |
| ERCC1  | Hs01012156_m1 | DNA damage and repair               | AP-1/MZF1                                          | 45      |
| ETS1   | Hs00901423_m1 | p38/JNK                             | p38                                                | 46      |
| FANCA  | Hs01116661_m1 | DNA damage and repair               | target of miR-503                                  | 47      |
| FANCD2 | Hs00395700_m1 | DNA damage and repair               | transcriptionally regulated under stress (hypoxia) | 48      |
| FANCG  | Hs00184947_m1 | DNA damage and repair               | target of stress responsive miR23a                 | 49      |
| FANCM  | Hs00913609_m1 | DNA damage and repair               | HOXC9                                              | 13      |
| FAS    | Hs00531110_m1 | apoptosis                           | p53/NFkB                                           | 17 50 , |
| FASLG  | Hs00181226_g1 | apoptosis                           | p53/NFkB                                           | 51      |
| FEN1   | Hs01099393_g1 | DNA damage and repair               | p53/AP1                                            | 52      |
| FOS    | Hs01119266_g1 | p38/JNK                             | p53/p38                                            | 44      |
| FOSL1  | Hs04187685_m1 | p38/JNK                             | p38                                                | 44      |
| FTH1   | Hs01000476_g1 | ROS                                 | NFkB                                               | 53      |

|          |               |                                     |                                                |              |
|----------|---------------|-------------------------------------|------------------------------------------------|--------------|
| GRB2     | Hs00257910_s1 | necrosis/autophagy                  |                                                |              |
| GSTP1    | Hs00168310_m1 | ROS                                 | NFkB                                           | 54           |
| HERPUD1  | Hs01124265_m1 | UPR/ER Stress                       | UPR target gene                                | 40           |
| HGF      | Hs00900067_m1 | proliferation/cell cycle regulation | p53/NFBkB                                      | 17 55 ,      |
| HIF1A    | Hs00936368_m1 | ROS                                 | NFkB/transcriptionally regulated under hypoxia | 56 57 ,      |
| HMOX1    | Hs01110250_m1 | ROS                                 | NFkB                                           | 58           |
| HRK      | Hs01388767_g1 | apoptosis                           | prosurvival signals and oncogenes              | 59           |
| HSP90AA1 | Hs00743767_sH | UPR/ER Stress                       | NFkB                                           | 60           |
| HSPA5    | Hs00946084_g1 | UPR/ER Stress                       | UPR target gene                                | 40           |
| IER3     | Hs04187506_g1 | apoptosis                           | p53/NFBkB                                      | 16 61 ,      |
| IGFBP3   | Hs00426287_m1 | proliferation/cell cycle regulation | p53                                            | 16           |
| JUN      | Hs00277190_s1 | p38/JNK                             | p38                                            | 44           |
| JUND     | Hs02330233_u1 | p38/JNK                             | p38                                            | 62           |
| KLF6     | Hs00296661_s1 | p38/JNK                             | p38                                            | 44           |
| MAFF     | Hs00202412_m1 | p38/JNK                             | p38                                            | 44           |
| MAPK8    | Hs01548508_m1 | p38/JNK                             | KLF4/FOXM1                                     | 63           |
| MCL1     | Hs00172036_m1 | apoptosis                           | prosurvival signals and oncogenes              | 64           |
| MDM2     | Hs00234753_m1 | proliferation/cell cycle regulation | p53                                            | 17           |
| MDM4     | Hs00159092_m1 | proliferation/cell cycle regulation | p53                                            | 17           |
| MET      | Hs01565584_m1 | proliferation/cell cycle regulation | p53                                            | 16           |
| MLH1     | Hs00179866_m1 | DNA damage and repair               | p53/AP1                                        | 17           |
| MSH2     | Hs00954125_m1 | DNA damage and repair               | p53/AP1                                        | 16           |
| MYC      | Hs00905030_m1 | proliferation/cell cycle regulation | p53/NFBkB/p38                                  | 17 65 44 , , |
| NLRP2    | Hs01546932_m1 | DNA damage and repair               | NFkB                                           | 66           |
| NOS2A    | Hs01075523_m1 | apoptosis                           | NFkB                                           | 67           |
| NQO1     | Hs00168547_m1 | ROS                                 | NFkB                                           | 68           |
| OAS1     | Hs00242943_m1 | p38/JNK                             | p38                                            | 44           |
| P2RY13   | Hs01090437_g1 | UPR/ER Stress                       | UPR target gene                                |              |
| PARP1    | Hs00911377_g1 | necrosis/autophagy                  |                                                |              |
| PCNA     | Hs00696862_m1 | proliferation/cell cycle regulation | p53/AP1                                        | 17           |



|           |               |                                     |                                                    |    |
|-----------|---------------|-------------------------------------|----------------------------------------------------|----|
| PGK1      | Hs00943178_g1 | housekeeping gene                   |                                                    |    |
| PHLDA1    | Hs00378285_g1 | p38/JNK                             | p38                                                | 44 |
| PIDD      | Hs01076855_g1 | apoptosis                           | p53                                                | 69 |
| PLA2G6    | Hs00895666_m1 | UPR/ER Stress                       | UPR target gene                                    | 70 |
| PMAIP1    | Hs00560402_m1 | apoptosis                           | p53                                                | 17 |
| POL2RB    | Hs00265358_m1 | housekeeping gene                   |                                                    |    |
| PPP1R15A  | Hs00921550_g1 | UPR/ER Stress                       | UPR target gene                                    | 71 |
| PRDX1     | Hs03044568_g1 | ROS                                 | NRF-2 upon oxidative stress                        | 72 |
| PVR       | Hs00197846_m1 | necrosis/autophagy                  | NRF-1 upon oxidative stress                        | 73 |
| RAD51     | Hs00947964_m1 | DNA damage and repair               | transcriptionally regulated under stress (hypoxia) | 48 |
| RB1       | Hs01078075_m1 | proliferation/cell cycle regulation | p53                                                | 16 |
| RIPK1     | Hs00169407_m1 | necrosis/autophagy                  |                                                    |    |
| RPA1      | Hs01556877_m1 | proliferation/cell cycle regulation |                                                    |    |
| RPLP0     | Hs02992885_s1 | housekeeping gene                   |                                                    |    |
| RRM2B     | Hs00968427_m1 | DNA damage and repair               | p53                                                | 74 |
| SENP2     | Hs00989703_m1 | apoptosis                           | NFkB                                               | 75 |
| SESN1     | Hs00902782_m1 | DNA damage and repair               | p53                                                | 17 |
| SFN       | Hs00968567_s1 | proliferation/cell cycle regulation | p53                                                | 76 |
| SHISA5    | Hs00429977_m1 | apoptosis                           | p53                                                | 77 |
| SIRT1     | Hs01009000_m1 | DNA damage and repair               | target of stress inducible miR34a and HuR          | 78 |
| SOD1      | Hs00916176_m1 | ROS                                 | NFkB                                               | 79 |
| SOD2      | Hs04260076_g1 | ROS                                 | NFkB                                               | 80 |
| SQSTM1    | Hs01061917_g1 | ROS                                 | NRF-2 upon oxidative stress                        | 81 |
| SUMO1     | Hs00830844_g1 | DNA damage and repair               | target of stress inducible miR150                  |    |
| TAP73     | Hs01056228_m1 | proliferation/cell cycle regulation | p53                                                | 82 |
| TBP       | Hs00427621_m1 | housekeeping gene                   |                                                    |    |
| TERT      | Hs00972656_m1 | proliferation/cell cycle regulation | p53/NFkB                                           | 83 |
| TNFRSF10A | Hs00269492_m1 | apoptosis                           | p53/NFkB                                           | 84 |
| TNFRSF10B | Hs00366278_m1 | apoptosis                           | p53/NFkB                                           | 17 |
| TNFRSF10C | Hs00182570_m1 | apoptosis                           | p53/NFkB                                           | 85 |

|                  |                      |                                            |                                         |               |
|------------------|----------------------|--------------------------------------------|-----------------------------------------|---------------|
| <b>TNFRSF10D</b> | <b>Hs04187502_m1</b> | <b>apoptosis</b>                           | <b>p53/NFBkB</b>                        | <b>17</b>     |
| <b>TP53</b>      | <b>Hs99999147_m1</b> | <b>proliferation/cell cycle regulation</b> | <b>p53/NFBkB</b>                        | <b>86, 16</b> |
| <b>TP53AIP1</b>  | <b>Hs00986095_m1</b> | <b>apoptosis</b>                           | <b>p53/NFBkB</b>                        | <b>87</b>     |
| <b>TP53I3</b>    | <b>Hs00936520_m1</b> | <b>DNA damage and repair</b>               | <b>p53/NFBkB</b>                        | <b>17</b>     |
| <b>TP53INP1</b>  | <b>Hs00264502_m1</b> | <b>DNA damage and repair</b>               | <b>p53/NFBkB</b>                        | <b>17</b>     |
| <b>TP63</b>      | <b>Hs00978342_m1</b> | <b>proliferation/cell cycle regulation</b> | <b>p53/NFBkB</b>                        | <b>16</b>     |
| <b>TP73</b>      | <b>Hs01056230_m1</b> | <b>proliferation/cell cycle regulation</b> | <b>p53/NFBkB</b>                        | <b>17</b>     |
| <b>TRAF1</b>     | <b>Hs01090167_g1</b> | <b>apoptosis</b>                           | <b>p53/NFBkB</b>                        | <b>88</b>     |
| <b>TRAF2</b>     | <b>Hs00184192_m1</b> | <b>apoptosis</b>                           | <b>p53/NFBkB</b>                        | <b>89</b>     |
| <b>TRPM3</b>     | <b>Hs01558432_m1</b> | <b>p38/JNK</b>                             |                                         |               |
| <b>TXN</b>       | <b>Hs00828652_m1</b> | <b>ROS</b>                                 | <b>NRF-2 upon oxidative stress</b>      | <b>90</b>     |
| <b>XBP1</b>      | <b>Hs00231936_m1</b> | <b>UPR/ER Stress</b>                       | <b>UPR target gene</b>                  | <b>91</b>     |
| <b>XBP1(U)</b>   | <b>Hs02856596_m1</b> | <b>UPR/ER Stress</b>                       | <b>UPR target gene</b>                  | <b>91</b>     |
| <b>XIAP</b>      | <b>Hs00745222_s1</b> | <b>apoptosis</b>                           | <b>NFkB</b>                             | <b>92</b>     |
| <b>XPA</b>       | <b>Hs00166045_m1</b> | <b>DNA damage and repair</b>               | <b>HIF1a</b>                            | <b>57</b>     |
| <b>XPC</b>       | <b>Hs01104213_m1</b> | <b>DNA damage and repair</b>               | <b>p53/BRCA1/AP1</b>                    | <b>17</b>     |
| <b>XRCC1</b>     | <b>Hs00959834_m1</b> | <b>DNA damage and repair</b>               | <b>E2F1/AP1</b>                         | <b>93</b>     |
| <b>XRCC3</b>     | <b>Hs00193725_m1</b> | <b>DNA damage and repair</b>               | <b>transcr inducable by irradiation</b> | <b>94</b>     |
| <b>ZFP36</b>     | <b>Hs00185658_m1</b> | <b>p38/JNK</b>                             | <b>p38</b>                              | <b>44</b>     |
| <b>ZMAT3</b>     | <b>Hs00536976_m1</b> | <b>apoptosis</b>                           | <b>p53</b>                              | <b>95</b>     |

Supplementary Table 2: Part 1: The fold-changes in transcriptional biomarkers observed in slices from H1437 after cultivation.

H1437 lung CDX

| filter, atmospheric oxygen vs in vivo |           |       |          |           |
|---------------------------------------|-----------|-------|----------|-----------|
| process                               | ID        | logFC | P.Value  | adj.P.Val |
| apoptosis                             | HRK       | 3.06  | 2.21E-03 | 1.91E-02  |
| apoptosis                             | BNIP3     | 1.41  | 5.53E-04 | 6.09E-03  |
| apoptosis                             | TNFRSF10C | 1.00  | 1.83E-04 | 3.16E-03  |
| cell cycle                            | IGFBP3    | 3.29  | 1.08E-03 | 1.09E-02  |
| cell cycle                            | EGFR      | 1.35  | 4.91E-03 | 3.64E-02  |
| cell cycle                            | BTG2      | 1.09  | 7.47E-03 | 4.76E-02  |
| DDR                                   | TP53I3    | -1.02 | 5.11E-03 | 3.64E-02  |
| p38/JNK                               | FOS       | 2.26  | 2.38E-06 | 1.44E-04  |
| p38/JNK                               | EGR1      | 1.76  | 3.43E-05 | 1.06E-03  |
| p38/JNK                               | ETS1      | 1.52  | 6.18E-05 | 1.25E-03  |
| p38/JNK                               | KLF6      | -1.06 | 3.79E-05 | 1.06E-03  |
| ROS                                   | SOD2      | 1.69  | 4.37E-05 | 1.06E-03  |
| UPR/ER str                            | ATF3      | 2.70  | 2.36E-07 | 2.85E-05  |

| filter, low oxygen vs in vivo |           |       |          |           |
|-------------------------------|-----------|-------|----------|-----------|
| process                       | ID        | logFC | P.Value  | adj.P.Val |
| apoptosis                     | BCL2A1    | 3.01  | 1.16E-03 | 2.86E-03  |
| apoptosis                     | MCL1      | 2.76  | 1.12E-07 | 1.23E-06  |
| apoptosis                     | IER3      | 2.72  | 7.86E-04 | 2.21E-03  |
| apoptosis                     | TNFRSF10C | 2.51  | 1.01E-08 | 2.05E-07  |
| apoptosis                     | BNIP3     | 2.23  | 7.72E-06 | 4.45E-05  |
| apoptosis                     | TRAF1     | 2.12  | 8.58E-05 | 3.35E-04  |
| apoptosis                     | BCL2L1    | 1.88  | 6.87E-08 | 3.35E-07  |
| apoptosis                     | TNFRSF10C | 1.88  | 6.87E-08 | 3.35E-07  |
| apoptosis                     | BCL2L1    | 1.39  | 1.39E-03 | 3.16E-04  |
| apoptosis                     | PMAIP1    | 1.29  | 3.59E-06 | 2.29E-05  |
| apoptosis                     | XIAP      | 1.28  | 8.55E-06 | 4.50E-05  |
| apoptosis                     | TNFRSF10C | 1.04  | 4.07E-03 | 8.48E-03  |
| apoptosis                     | FAS       | -1.11 | 7.57E-03 | 1.40E-02  |
| apoptosis                     | ZMAT3     | -1.14 | 1.06E-03 | 2.71E-03  |
| cell cycle                    | IGFBP3    | 4.36  | 9.71E-05 | 3.56E-04  |
| cell cycle                    | TP73      | 3.55  | 2.69E-04 | 8.33E-04  |
| cell cycle                    | Tap73     | 3.32  | 1.19E-03 | 2.88E-03  |
| cell cycle                    | BTG2      | 3.27  | 3.68E-07 | 3.18E-06  |
| cell cycle                    | EGFR      | 2.84  | 8.32E-06 | 4.50E-05  |
| cell cycle                    | CDKN1A    | 2.81  | 1.17E-06 | 8.31E-06  |
| cell cycle                    | MET       | 1.96  | 1.96E-07 | 1.82E-06  |
| cell cycle                    | CDKN1B    | 1.49  | 1.04E-06 | 7.88E-06  |
| cell cycle                    | TP63      | 1.25  | 1.14E-02 | 1.19E-02  |
| cell cycle                    | PCNA      | -1.56 | 2.09E-04 | 6.82E-04  |
| cell cycle                    | CDC25C    | -1.71 | 6.22E-04 | 1.84E-03  |
| cell cycle                    | CEN2A     | -1.84 | 1.30E-03 | 3.03E-03  |
| cell cycle                    | CCNB1     | -1.89 | 1.93E-04 | 6.65E-04  |
| cell cycle                    | CHEK1     | -2.06 | 1.12E-04 | 3.97E-04  |
| cell cycle                    | HGF       | -2.21 | 2.55E-02 | 4.17E-02  |
| cell cycle                    | CDK1      | -2.84 | 4.23E-06 | 2.56E-05  |
| DDR                           | ERCC1     | 1.44  | 8.76E-04 | 2.36E-03  |
| DDR                           | TP53INP1  | 1.07  | 3.18E-03 | 6.75E-03  |
| DDR                           | MSH2      | -1.08 | 1.98E-04 | 6.65E-04  |
| DDR                           | SESN1     | -1.09 | 1.21E-05 | 5.84E-05  |
| DDR                           | XRCC3     | -1.93 | 2.22E-04 | 7.06E-04  |
| DDR                           | FANCD2    | -2.01 | 1.20E-05 | 5.84E-05  |
| DDR                           | ATR       | -2.15 | 6.90E-08 | 8.35E-07  |
| DDR                           | BLM       | -2.24 | 8.92E-05 | 3.37E-04  |
| DDR                           | FANCM     | -2.26 | 1.87E-07 | 1.82E-06  |
| DDR                           | BRCA1     | -2.68 | 5.57E-07 | 4.50E-06  |
| DDR                           | RAD51     | -2.73 | 6.31E-05 | 2.63E-04  |
| apoptosis                     | PARP1     | -1.00 | 5.35E-03 | 1.08E-02  |
| p38/JNK                       | ETS1      | 4.72  | 1.72E-10 | 1.04E-08  |
| p38/JNK                       | EGR1      | 4.02  | 3.53E-09 | 1.43E-07  |
| p38/JNK                       | FOS       | 3.84  | 5.40E-09 | 1.63E-07  |
| p38/JNK                       | MAFF      | 3.52  | 2.69E-05 | 1.21E-04  |
| p38/JNK                       | FOSL1     | 2.89  | 1.07E-03 | 2.71E-03  |
| p38/JNK                       | JUN       | 2.73  | 6.93E-04 | 2.00E-03  |
| p38/JNK                       | ZFP36     | 2.42  | 4.61E-03 | 9.45E-03  |
| p38/JNK                       | PHLDA1    | 2.34  | 2.17E-06 | 1.46E-05  |
| p38/JNK                       | KLF6      | 1.93  | 5.53E-08 | 8.35E-07  |
| ROS                           | SOD2      | 3.67  | 8.25E-09 | 2.00E-07  |
| ROS                           | NQO1      | -1.41 | 7.61E-03 | 1.40E-02  |
| UPR/ER str                    | ATF3      | 5.94  | 1.76E-11 | 2.13E-09  |
| UPR/ER str                    | PPP1R15A  | 4.56  | 4.71E-05 | 2.04E-04  |
| UPR/ER str                    | HSPA5     | 1.87  | 1.41E-08 | 2.44E-07  |
| UPR/ER str                    | HERPUD1   | 1.65  | 2.44E-05 | 1.13E-04  |
| UPR/ER str                    | PLA2G6    | 1.04  | 1.77E-02 | 3.01E-02  |
| UPR/ER str                    | EDEM1     | 1.02  | 8.56E-05 | 3.35E-04  |
| UPR/ER str                    | XBP1      | -1.36 | 2.69E-03 | 5.80E-03  |
| UPR/ER str                    | XBP1(U)   | -1.44 | 1.68E-03 | 3.76E-03  |

| floating, atmospheric oxygen vs in vivo |           |       |          |           |
|-----------------------------------------|-----------|-------|----------|-----------|
| process                                 | ID        | logFC | P.Value  | adj.P.Val |
| apoptosis                               | BCL2A1    | 3.74  | 3.86E-04 | 1.20E-03  |
| apoptosis                               | MCL1      | 3.03  | 3.78E-08 | 5.08E-07  |
| apoptosis                               | TNFRSF10C | 2.83  | 2.32E-09 | 9.36E-08  |
| apoptosis                               | BNIP3     | 2.81  | 6.33E-07 | 4.50E-06  |
| apoptosis                               | TRAF1     | 2.31  | 3.69E-05 | 1.59E-04  |
| apoptosis                               | IER3      | 2.24  | 3.34E-03 | 7.93E-03  |
| apoptosis                               | BOK       | 2.16  | 1.85E-02 | 3.20E-02  |
| apoptosis                               | TNFRSF10C | 2.11  | 1.79E-08 | 2.71E-07  |
| apoptosis                               | PMAIP1    | 1.51  | 6.07E-07 | 4.50E-06  |
| apoptosis                               | BCL2L1    | 1.30  | 2.30E-03 | 5.67E-03  |
| apoptosis                               | BIK       | 1.06  | 2.44E-02 | 3.94E-02  |
| apoptosis                               | BAK1      | 1.01  | 2.09E-02 | 3.46E-02  |
| apoptosis                               | FAS       | -1.07 | 9.06E-03 | 1.78E-02  |
| cell cycle                              | IGFBP3    | 5.52  | 9.58E-06 | 5.52E-05  |
| cell cycle                              | TP73      | 4.13  | 7.13E-05 | 2.70E-04  |
| cell cycle                              | Tap73     | 3.59  | 6.48E-04 | 1.91E-03  |
| cell cycle                              | CDKN1A    | 3.41  | 1.33E-07 | 1.46E-06  |
| cell cycle                              | EGFR      | 2.86  | 7.62E-06 | 4.61E-05  |
| cell cycle                              | MET       | 2.44  | 1.53E-08 | 2.71E-07  |
| cell cycle                              | BTG2      | 2.19  | 2.60E-05 | 1.31E-04  |
| cell cycle                              | CDKN1B    | 1.66  | 3.01E-07 | 2.92E-06  |
| cell cycle                              | CHEK1     | -1.15 | 9.25E-03 | 1.78E-02  |
| cell cycle                              | CDK1      | -1.23 | 5.92E-03 | 1.26E-02  |
| cell cycle                              | HGF       | -1.64 | 2.70E-02 | 4.18E-02  |
| DDR                                     | ERCC1     | 2.10  | 2.97E-05 | 1.38E-04  |
| DDR                                     | TP53INP1  | 1.40  | 4.14E-04 | 1.25E-03  |
| DDR                                     | SIRT1     | 1.22  | 1.09E-04 | 3.76E-04  |
| DDR                                     | FANCD2    | -1.04 | 3.50E-03 | 8.14E-03  |
| DDR                                     | BRCA1     | -1.27 | 8.15E-04 | 2.34E-03  |
| DDR                                     | BLM       | -1.28 | 7.12E-03 | 1.46E-02  |
| DDR                                     | RAD51     | -1.75 | 4.95E-03 | 1.11E-02  |
| DDR                                     | ATR       | -1.88 | 3.14E-07 | 2.92E-06  |
| DDR                                     | FANCM     | -2.06 | 5.37E-07 | 4.33E-06  |
| necrosis                                | PVR       | 1.99  | 5.67E-03 | 1.23E-02  |
| necrosis                                | ATG5      | 1.20  | 1.85E-05 | 9.71E-05  |
| necrosis                                | ATG7      | 1.07  | 6.02E-05 | 2.43E-04  |
| p38/JNK                                 | MAFF      | 4.76  | 1.16E-06 | 7.78E-06  |
| p38/JNK                                 | ETS1      | 4.70  | 1.83E-10 | 1.11E-08  |
| p38/JNK                                 | FOSL1     | 3.96  | 7.11E-05 | 2.70E-04  |
| p38/JNK                                 | EGR1      | 3.65  | 1.11E-08 | 2.70E-07  |
| p38/JNK                                 | JUN       | 3.47  | 8.70E-05 | 3.09E-04  |
| p38/JNK                                 | FOS       | 3.18  | 5.09E-08 | 6.15E-07  |
| p38/JNK                                 | ZFP36     | 2.80  | 1.64E-03 | 4.22E-03  |
| p38/JNK                                 | PHLDA1    | 2.42  | 1.53E-06 | 9.75E-06  |
| p38/JNK                                 | KLF6      | 1.59  | 5.01E-07 | 4.33E-06  |
| p38/JNK                                 | MAPK8     | 1.06  | 1.37E-02 | 2.48E-02  |
| ROS                                     | SOD2      | 3.44  | 1.78E-08 | 2.71E-07  |
| ROS                                     | SQSTM1    | 1.47  | 1.09E-03 | 3.01E-03  |
| ROS                                     | HMOX1     | 1.29  | 2.00E-02 | 3.36E-02  |
| ROS                                     | NQO1      | -1.08 | 3.15E-02 | 4.82E-02  |
| ROS                                     | HIF1A     | -1.22 | 3.32E-05 | 1.49E-04  |
| UPR/ER str                              | PPP1R15A  | 5.32  | 1.01E-05 | 5.58E-05  |
| UPR/ER str                              | ATF3      | 5.22  | 8.82E-11 | 1.07E-08  |
| UPR/ER str                              | HSPA5     | 1.92  | 1.06E-08 | 2.70E-07  |
| UPR/ER str                              | PLA2G6    | 1.44  | 2.46E-03 | 5.96E-03  |
| UPR/ER str                              | HERPUD1   | 1.36  | 1.55E-04 | 5.22E-04  |
| UPR/ER str                              | EDEM1     | 1.13  | 2.95E-05 | 1.38E-04  |
| UPR/ER str                              | XBP1(U)   | -1.12 | 9.12E-03 | 1.78E-02  |

| floating, low oxygen vs in vivo |           |       |          |           |
|---------------------------------|-----------|-------|----------|-----------|
| process                         | ID        | logFC | P.Value  | adj.P.Val |
| apoptosis                       | BCL2A1    | 3.55  | 4.90E-04 | 9.72E-04  |
| apoptosis                       | MCL1      | 3.29  | 1.42E-08 | 1.71E-07  |
| apoptosis                       | TNFRSF10C | 3.14  | 6.63E-10 | 2.01E-08  |
| apoptosis                       | BNIP3     | 3.12  | 1.96E-07 | 1.25E-06  |
| apoptosis                       | TRAF1     | 2.25  | 4.88E-05 | 1.34E-04  |
| apoptosis                       | TNFRSF10C | 2.16  | 1.35E-08 | 1.71E-07  |
| apoptosis                       | IER3      | 2.14  | 4.48E-03 | 6.69E-03  |
| apoptosis                       | PMAIP1    | 2.12  | 1.23E-08 | 1.71E-07  |
| apoptosis                       | XIAP      | 1.74  | 2.95E-07 | 1.79E-06  |
| apoptosis                       | BCL2L1    | 1.69  | 2.73E-04 | 5.60E-04  |
| apoptosis                       | TNFRSF10C | 1.11  | 2.50E-03 | 4.03E-03  |
| apoptosis                       | BID       | -1.36 | 4.44E-03 | 6.69E-03  |
| apoptosis                       | ZMAT3     | -1.50 | 1.05E-04 | 2.49E-04  |
| apoptosis                       | FAS       | -1.59 | 5.87E-04 | 1.11E-03  |
| cell cycle                      | IGFBP3    | 5.94  | 4.41E-06 | 1.69E-05  |
| cell cycle                      | TP73      | 4.78  | 1.85E-05 | 6.06E-05  |
| cell cycle                      | Tap73     | 4.19  | 1.84E-04 | 3.90E-04  |
| cell cycle                      | EGFR      | 3.58  | 6.83E-07 | 3.44E-06  |
| cell cycle                      | CDKN1A    | 3.50  | 9.89E-08 | 7.04E-07  |
| cell cycle                      | BTG2      | 2.91  | 1.38E-06 | 6.40E-06  |
| cell cycle                      | MET       | 2.52  | 1.07E-08 | 1.71E-07  |
| cell cycle                      | TP63      | 1.91  | 5.88E-04 | 1.11E-03  |
| cell cycle                      | CDKN1B    | 1.87  | 7.50E-08 | 6.48E-07  |
| cell cycle                      | RB1       | 1.21  | 4.42E-06 | 1.69E-05  |
| cell cycle                      | MDM4      | 1.05  | 1.76E-04 | 3.80E-04  |
| cell cycle                      | MYC       | -1.53 | 2.56E-03 | 4.08E-03  |
| cell cycle                      | PCNA      | -1.65 | 1.30E-04 | 2.97E-04  |
| cell cycle                      | CHEK1     | -2.12 | 8.64E-05 | 2.13E-04  |
| cell cycle                      | CDC25C    | -2.41 | 2.80E-05 | 8.47E-05  |
| cell cycle                      | CCNB1     | -2.78 | 4.48E-06 | 1.69E-05  |
| cell cycle                      | CEN2A     | -2.93 | 2.08E-05 | 6.45E-05  |
| cell cycle                      | CDK1      | -4.04 | 8.22E-08 | 6.63E-07  |
| DDR                             | ERCC1     | 1.92  | 7.25E-05 | 1.91E-04  |
| DDR                             | TP53INP1  | 1.33  | 6.43E-04 | 1.20E-03  |
| DDR                             | DBP2      | 1.01  | 6.90E-03 | 1.01E-02  |
| DDR                             | MSH2      | -1.33 | 2.90E-05 | 8.56E-05  |
| DDR                             | XRCC3     | -1.56 | 1.26E-03 | 2.21E-03  |
| DDR                             | SESN1     | -1.61 | 1.78E-07 | 1.20E-06  |
| DDR                             | FANCA     | -2.11 | 4.98E-04 | 9.73E-04  |
| DDR                             | FANCM     | -2.14 | 3.48E-07 | 2.00E-06  |
| DDR                             | ATR       | -2.38 | 2.04E-08 | 2.06E-07  |
| DDR                             | FANCD2    | -2.61 | 7.44E-07 | 3.60E-06  |
| DDR                             | BRCA1     | -2.65 | 6.42E-07 | 3.38E-06  |
| DDR                             | BLM       | -3.30 | 1.80E-06 | 8.05E-06  |
| DDR                             | RAD51     | -3.41 | 8.63E-06 | 2.90E-05  |
| necrosis                        | PVR       | 1.85  | 8.79E-03 | 1.21E-02  |
| necrosis                        | ATG5      | 1.37  | 4.68E-06 | 1.71E-05  |
| necrosis                        | ATG7      | 1.16  | 8.88E-05 | 2.15E-04  |
| necrosis                        | ATG7      | 1.14  | 3.49E-05 | 1.01E-04  |
| necrosis                        | RIPK1     | 1.02  | 5.02E-05 | 1.35E-04  |
| necrosis                        | PARP1     | -1.82 | 4.34E-05 | 1.22E-04  |
| p38/JNK                         | ETS1      | 5.53  | 2.43E-11 | 1.47E-09  |
| p38/JNK                         | MAFF      | 4.22  | 4.18E-06 | 1.69E-05  |
| p38/JNK                         | JUN       | 4.04  | 1.98E-05 | 6.31E-05  |
| p38/JNK                         | EGR1      | 3.85  | 6.05E-09 | 1.22E-07  |
| p38/JNK                         | FOSL1     | 3.71  | 1.28E-04 | 2.97E-04  |
| p38/JNK                         | FOS       | 3.45  | 1.94E-08 | 2.06E-07  |
| p38/JNK                         | KLF6      | 2.36  | 5.15E-09 | 1.22E-07  |
| p38/JNK                         | PHLDA1    | 2.30  | 2.61E-06 | 1.13E-05  |
| p38/JNK                         | ZFP36     | 2.18  | 8.70E-03 | 1.21E-02  |
| p38/JNK                         | MAPK8     | 1.15  | 8.46E-03 | 1.20E-02  |
| ROS                             | SOD2      | 2.98  | 9.67E-08 | 7.04E-07  |
| ROS                             | SQSTM1    | 1.22  | 4.07E-03 | 6.23E-03  |
| ROS                             | PRDX1     | -1.06 | 1.83E-03 | 3.00E-03  |
| ROS                             | SOD1      | -1.06 | 1.67E-03 | 2.80E-03  |
| ROS                             | HIF1A     | -1.40 | 8.63E-06 | 2.90E-05  |
| ROS                             | GSTP1     | -1.63 | 1.57E-03 | 2.71E-03  |
| ROS                             | NQO1      | -2.38 | 1.44E-04 | 3.22E-04  |
| UPR/ER str                      | ATF3      | 6.14  | 1.17E-11 | 1.41E-09  |
| UPR/ER str                      | PPP1R15A  | 5.63  | 5.59E-06 | 1.99E-05  |
| UPR/ER str                      | HSPA5     | 3.02  | 4.25E-11 | 1.71E-09  |
| UPR/ER str                      | HERPUD1   | 2.37  | 5.20E-07 | 2.86E-06  |
| UPR/ER str                      | EDEM1     | 2.00  | 6.19E-08 | 5.76E-07  |
| UPR/ER str                      | PLA2G6    | 1.41  | 2.86E-03 | 4.49E-03  |
| UPR/ER str                      | ATF4      | 1.30  | 8.48E-05 | 2.13E-04  |
| UPR/ER str                      | XBP1      | -1.77 | 3.57E-04 | 7.20E-04  |
| UPR/ER str                      | XBP1(U)   | -2.06 | 8.37E-05 | 2.13E-04  |

Red indicates significantly up-regulated genes, and green indicates down-regulated genes ( $p < 0.05$ ). The different stress pathways are indicated by different colors.

Supplementary Table 2: Part 2: The fold-changes in transcriptional biomarkers observed in slices from 1647 lung PDX after cultivation.

1647 lung PDX

filter, atmospheric oxygen vs in vivo

| process       | ID       | logFC | P.Value  | adj.P.Val |
|---------------|----------|-------|----------|-----------|
| apoptosis     | HRK      | 1.87  | 2.77E-05 | 4.12E-04  |
| apoptosis     | ALOX12   | 1.41  | 9.71E-06 | 1.93E-04  |
| apoptosis     | IER3     | 1.03  | 1.37E-04 | 1.36E-03  |
| DDR           | FANCM    | -1.06 | 8.13E-06 | 1.93E-04  |
| DDR           | XPA      | -1.10 | 6.15E-05 | 6.65E-04  |
| DDR           | SES1     | -1.26 | 1.66E-05 | 2.83E-04  |
| UPR/ER stress | ATF3     | 1.37  | 1.44E-07 | 1.71E-05  |
| UPR/ER Stress | PPP1R15A | 1.19  | 5.41E-06 | 1.93E-04  |
| UPR/ER Stress | EPHB1    | -2.76 | 8.01E-06 | 1.93E-04  |

filter, low oxygen vs in vivo

| process          | ID        | logFC | P.Value  | adj.P.Val |
|------------------|-----------|-------|----------|-----------|
| apoptosis        | HRK       | 2.13  | 6.05E-06 | 4.24E-05  |
| apoptosis        | TNFRSF10D | 1.99  | 1.24E-09 | 3.68E-08  |
| apoptosis        | ALOX12    | 1.95  | 1.35E-07 | 2.30E-06  |
| apoptosis        | IER3      | 1.81  | 1.27E-07 | 2.30E-06  |
| apoptosis        | BNIP3     | 1.41  | 8.46E-07 | 8.39E-06  |
| apoptosis        | TNFRSF10B | 1.32  | 6.19E-07 | 6.70E-06  |
| apoptosis        | BCL2L11   | 1.16  | 1.45E-05 | 7.91E-05  |
| cell cycle       | IGFBP3    | 2.36  | 8.48E-11 | 5.05E-09  |
| cell cycle       | CDKN1B    | 1.45  | 1.27E-06 | 1.16E-05  |
| cell cycle       | MET       | 1.37  | 5.09E-07 | 6.06E-06  |
| cell cycle       | CDKN1A    | 1.12  | 9.49E-06 | 5.94E-05  |
| cell cycle       | TP73      | 1.04  | 7.66E-05 | 2.94E-04  |
| cell cycle       | EGFR      | 1.04  | 1.32E-05 | 7.86E-05  |
| DDR              | BLM       | -1.06 | 1.72E-05 | 8.51E-05  |
| DDR              | BRCA1     | -1.07 | 2.76E-06 | 2.34E-05  |
| DDR              | SES1      | -1.26 | 1.61E-05 | 8.31E-05  |
| DDR              | FANCM     | -1.45 | 1.22E-07 | 2.30E-06  |
| necrosis/autoph. | PVR       | 1.27  | 7.49E-06 | 4.95E-05  |
| p38/JNK          | MAFF      | 1.80  | 4.55E-07 | 6.01E-06  |
| p38/JNK          | FOS       | 1.51  | 1.46E-05 | 7.91E-05  |
| p38/JNK          | ZFP36     | 1.33  | 5.50E-06 | 4.09E-05  |
| p38/JNK          | ETS1      | 1.29  | 2.62E-05 | 1.25E-04  |
| ROS              | SOD2      | 1.19  | 5.01E-06 | 3.97E-05  |
| ROS              | HMOX1     | 1.35  | 4.54E-04 | 1.38E-03  |
| UPR/ER stress    | ATF3      | 2.76  | 2.55E-12 | 3.04E-10  |
| UPR/ER Stress    | PPP1R15A  | 2.17  | 9.91E-10 | 3.68E-08  |
| UPR/ER Stress    | PLA2G6    | 1.58  | 3.80E-07 | 5.65E-06  |
| UPR/ER Stress    | HERPUD1   | 1.08  | 1.39E-04 | 5.01E-04  |

floating, atmospheric oxygen vs in vivo

| process          | ID        | logFC | P.Value  | adj.P.Val |
|------------------|-----------|-------|----------|-----------|
| apoptosis        | HRK       | 2.76  | 1.85E-07 | 2.76E-06  |
| apoptosis        | TNFRSF10D | 1.96  | 1.58E-09 | 5.92E-08  |
| apoptosis        | BNIP3     | 1.54  | 2.45E-07 | 3.24E-06  |
| apoptosis        | IER3      | 1.48  | 1.99E-06 | 1.69E-05  |
| apoptosis        | ALOX12    | 1.44  | 7.20E-06 | 4.29E-05  |
| apoptosis        | TNFRSF10B | 1.38  | 3.33E-07 | 3.96E-06  |
| apoptosis        | BCL2L11   | 1.31  | 3.40E-06 | 2.40E-05  |
| cell cycle       | IGFBP3    | 2.30  | 1.34E-10 | 7.98E-09  |
| cell cycle       | CDKN1B    | 1.68  | 1.67E-07 | 2.76E-06  |
| cell cycle       | MET       | 1.08  | 9.12E-06 | 5.17E-05  |
| cell cycle       | EGFR      | 1.04  | 1.26E-05 | 6.83E-05  |
| cell cycle       | TP63      | -1.22 | 9.85E-05 | 4.34E-04  |
| DDR              | MSH2      | -1.02 | 3.01E-06 | 2.39E-05  |
| DDR              | RAD51     | -1.09 | 2.80E-03 | 7.58E-03  |
| DDR              | SES1      | -1.11 | 7.23E-05 | 3.31E-04  |
| DDR              | BLM       | -1.31 | 1.25E-06 | 1.24E-05  |
| DDR              | BRCA1     | -1.38 | 9.00E-08 | 1.79E-06  |
| DDR              | FANCM     | -1.61 | 2.68E-08 | 6.39E-07  |
| necrosis/autoph. | PVR       | 1.33  | 3.87E-06 | 2.56E-05  |
| p38/JNK          | MAFF      | 1.73  | 7.91E-07 | 8.56E-06  |
| p38/JNK          | FOS       | 1.44  | 2.59E-05 | 1.28E-04  |
| ROS              | HMOX1     | 1.15  | 1.78E-03 | 5.16E-03  |
| UPR/ER stress    | ATF3      | 3.01  | 6.04E-13 | 7.19E-11  |
| UPR/ER Stress    | PPP1R15A  | 2.08  | 1.99E-09 | 5.92E-08  |
| UPR/ER Stress    | HERPUD1   | 1.57  | 1.62E-06 | 1.48E-05  |
| UPR/ER Stress    | HSPA5     | 1.35  | 3.43E-06 | 2.40E-05  |
| UPR/ER Stress    | PLA2G6    | 1.28  | 6.01E-06 | 3.76E-05  |

floating, low oxygen vs in vivo

| process          | ID        | logFC | P.Value  | adj.P.Val |
|------------------|-----------|-------|----------|-----------|
| apoptosis        | HRK       | 2.97  | 6.54E-08 | 5.56E-07  |
| apoptosis        | TNFRSF10D | 2.47  | 4.19E-11 | 2.36E-09  |
| apoptosis        | TNFRSF10B | 1.63  | 3.01E-08 | 3.58E-07  |
| apoptosis        | BNIP3     | 1.43  | 7.02E-07 | 4.40E-06  |
| apoptosis        | BCL2L11   | 1.35  | 2.27E-06 | 1.08E-05  |
| apoptosis        | IER3      | 1.23  | 1.91E-05 | 6.68E-05  |
| apoptosis        | CFLAR     | -1.04 | 1.07E-05 | 3.99E-05  |
| cell cycle       | IGFBP3    | 2.21  | 2.53E-10 | 5.03E-09  |
| cell cycle       | CDKN1B    | 1.68  | 1.70E-07 | 1.27E-06  |
| cell cycle       | EGFR      | 1.09  | 7.09E-06 | 2.91E-05  |
| cell cycle       | CDK1      | -1.17 | 3.19E-06 | 1.41E-05  |
| cell cycle       | CHEK1     | -1.23 | 5.83E-07 | 3.85E-06  |
| cell cycle       | CCNB1     | -1.29 | 2.09E-06 | 1.04E-05  |
| cell cycle       | TP63      | -3.08 | 3.44E-10 | 5.85E-09  |
| DDR              | ATR       | -1.02 | 8.73E-06 | 3.35E-05  |
| DDR              | XRCC3     | -1.07 | 7.97E-06 | 3.16E-05  |
| DDR              | SES1      | -1.19 | 3.31E-05 | 1.07E-04  |
| DDR              | MSH2      | -1.33 | 8.46E-08 | 6.71E-07  |
| DDR              | FANCD2    | -1.51 | 4.29E-08 | 4.64E-07  |
| DDR              | RAD51     | -1.61 | 1.87E-05 | 6.68E-05  |
| DDR              | BRCA1     | -2.19 | 7.93E-11 | 2.36E-09  |
| DDR              | BLM       | -2.23 | 5.26E-10 | 7.83E-09  |
| DDR              | FANCM     | -2.26 | 1.38E-10 | 3.27E-09  |
| necrosis/autoph. | PVR       | 1.16  | 2.06E-05 | 6.81E-05  |
| p38/JNK          | MAFF      | 1.73  | 8.04E-07 | 4.55E-06  |
| p38/JNK          | FOS       | 1.29  | 8.29E-05 | 2.47E-04  |
| p38/JNK          | EGR1      | -1.43 | 1.89E-07 | 1.32E-06  |
| p38/JNK          | OAS1      | -1.76 | 7.55E-07 | 4.50E-06  |
| ROS              | HMOX1     | 2.17  | 2.10E-06 | 1.04E-05  |
| ROS              | HIF1A     | -1.27 | 1.81E-06 | 9.78E-06  |
| UPR/ER stress    | ATF3      | 3.27  | 1.51E-13 | 1.80E-11  |
| UPR/ER Stress    | PPP1R15A  | 2.55  | 7.75E-11 | 2.36E-09  |
| UPR/ER Stress    | HERPUD1   | 2.00  | 5.90E-08 | 5.48E-07  |
| UPR/ER Stress    | HSPA5     | 1.98  | 1.71E-08 | 2.26E-07  |
| UPR/ER Stress    | PLA2G6    | 1.80  | 5.99E-08 | 5.48E-07  |
| UPR/ER Stress    | EPHB1     | -2.18 | 2.52E-06 | 1.15E-05  |

Red indicates significantly up-regulated genes, and green indicates down-regulated genes (p < 0.05). The different stress pathways are indicated by different colors.

Supplementary Table 2: Part 3: The fold-changes in transcriptional biomarkers observed in slices from PC295 prostate PDX after cultivation.

PC295 prostate PDX

filter, atmospheric oxygen vs in vivo

| process       | ID      | logFC | P.Value  | adj.P.Val |
|---------------|---------|-------|----------|-----------|
| apoptosis     | BCL2L14 | 2.02  | 5.07E-06 | 8.33E-05  |
| apoptosis     | PMAIP1  | 1.30  | 3.58E-06 | 8.22E-05  |
| apoptosis     | BNIP3   | 1.00  | 2.23E-03 | 1.02E-02  |
| cell cycle    | CDKN1B  | 1.39  | 3.36E-04 | 2.97E-03  |
| cell cycle    | MYC     | -1.16 | 8.20E-04 | 4.49E-03  |
| cell cycle    | TP53    | -1.95 | 2.08E-06 | 5.98E-05  |
| DDR           | XPC     | -1.07 | 6.12E-04 | 4.15E-03  |
| p38/JNK       | MAFF    | 4.23  | 7.93E-07 | 3.04E-05  |
| p38/JNK       | ESR1    | 4.11  | 1.76E-07 | 1.01E-05  |
| p38/JNK       | FOS     | 3.69  | 7.28E-04 | 4.19E-03  |
| p38/JNK       | OAS1    | 1.28  | 1.41E-02 | 4.52E-02  |
| p38/JNK       | PHLDA1  | 1.11  | 1.41E-02 | 4.52E-02  |
| p38/JNK       | KLf6    | 1.02  | 1.26E-04 | 1.32E-03  |
| ROS           | NQO1    | 1.73  | 4.55E-06 | 8.33E-05  |
| ROS           | HIF1A   | 1.03  | 6.35E-06 | 9.12E-05  |
| UPR/ER stress | ATF3    | 4.22  | 1.15E-09 | 1.33E-07  |

filter, low oxygen vs in vivo

| process          | ID      | logFC | P.Value  | adj.P.Val |
|------------------|---------|-------|----------|-----------|
| apoptosis        | PMAIP1  | 2.14  | 1.42E-08 | 4.09E-07  |
| apoptosis        | BNIP3   | 1.25  | 3.95E-04 | 1.30E-03  |
| apoptosis        | ZMAT3   | -1.02 | 5.32E-04 | 1.61E-03  |
| apoptosis        | BIK     | -1.03 | 1.46E-03 | 3.83E-03  |
| apoptosis        | TRAF1   | -1.25 | 1.21E-02 | 2.24E-02  |
| apoptosis        | SHISA5  | -2.08 | 1.03E-02 | 1.97E-02  |
| cell cycle       | CDKN1B  | 1.33  | 4.67E-04 | 1.45E-03  |
| cell cycle       | BTG2    | -1.17 | 3.92E-03 | 9.38E-03  |
| cell cycle       | PCNA    | -1.61 | 8.25E-07 | 8.63E-06  |
| cell cycle       | TP53    | -2.17 | 6.63E-07 | 7.62E-06  |
| cell cycle       | TERT    | -2.45 | 1.56E-02 | 2.80E-02  |
| cell cycle       | MYC     | -2.97 | 7.53E-08 | 1.61E-06  |
| DDR              | FANCM   | -1.24 | 6.02E-06 | 3.84E-05  |
| DDR              | XRCC1   | -1.25 | 1.02E-03 | 3.01E-03  |
| DDR              | MLH1    | -1.34 | 1.19E-07 | 1.95E-06  |
| DDR              | DDR2    | -1.36 | 1.75E-05 | 9.61E-05  |
| DDR              | RAD51   | -1.41 | 2.72E-06 | 2.09E-05  |
| DDR              | NLRP2   | -1.41 | 8.39E-08 | 1.61E-06  |
| DDR              | XRCC3   | -1.43 | 2.80E-02 | 4.67E-02  |
| DDR              | MSH2    | -1.44 | 4.94E-07 | 6.31E-06  |
| DDR              | ATM     | -1.54 | 1.10E-05 | 6.34E-05  |
| DDR              | FEN1    | -1.58 | 6.25E-05 | 2.99E-04  |
| DDR              | BLM     | -1.66 | 4.37E-06 | 3.14E-05  |
| DDR              | BRCA1   | -1.69 | 2.14E-06 | 1.84E-05  |
| DDR              | FANCG   | -1.76 | 1.15E-03 | 3.16E-03  |
| DDR              | XPC     | -1.94 | 2.24E-06 | 1.84E-05  |
| DDR              | ATR     | -2.02 | 5.97E-09 | 3.43E-07  |
| necrosis/autoph. | ATG7    | -1.07 | 9.78E-05 | 4.02E-04  |
| p38/JNK          | EGR1    | 5.24  | 1.09E-08 | 4.09E-07  |
| p38/JNK          | MAFF    | 4.50  | 4.17E-07 | 5.99E-06  |
| p38/JNK          | FOS     | 4.46  | 1.48E-04 | 5.68E-04  |
| p38/JNK          | ZFP36   | 2.71  | 1.82E-03 | 4.55E-03  |
| p38/JNK          | KLf6    | 1.62  | 1.33E-06 | 1.28E-05  |
| p38/JNK          | OAS1    | 1.49  | 6.37E-03 | 1.36E-02  |
| p38/JNK          | PHLDA1  | 1.06  | 1.83E-02 | 3.24E-02  |
| ROS              | NQO1    | 1.30  | 7.90E-05 | 3.53E-04  |
| UPR/ER stress    | ATF3    | 5.14  | 1.29E-10 | 1.48E-08  |
| UPR/ER Stress    | HERPUD1 | 1.59  | 5.03E-06 | 3.41E-05  |
| UPR/ER Stress    | ATF4    | 1.46  | 8.91E-06 | 5.39E-05  |
| UPR/ER Stress    | HSPA5   | 1.05  | 1.72E-04 | 6.37E-04  |
| UPR/ER Stress    | PLAZG6  | -1.34 | 6.02E-03 | 1.31E-02  |

floating, atmospheric oxygen vs in vivo

| process            | ID       | logFC | P.Value  | adj.P.Val |
|--------------------|----------|-------|----------|-----------|
| apoptosis          | PMAIP1   | 2.33  | 5.35E-09 | 1.54E-07  |
| apoptosis          | BNIP3    | 1.37  | 1.85E-04 | 6.46E-04  |
| apoptosis          | MCL1     | 1.13  | 5.15E-03 | 1.04E-02  |
| apoptosis          | AIFM2    | 1.02  | 2.86E-03 | 6.86E-03  |
| cell cycle         | CDKN1B   | 1.82  | 2.91E-05 | 1.34E-04  |
| cell cycle         | EGFR     | 1.50  | 1.14E-05 | 7.27E-05  |
| cell cycle         | CDKN1A   | 1.27  | 1.64E-03 | 4.23E-03  |
| cell cycle         | CHEK1    | -1.01 | 8.92E-04 | 2.44E-03  |
| cell cycle         | PCNA     | -1.14 | 2.77E-05 | 1.33E-04  |
| cell cycle         | TP53     | -1.60 | 1.58E-05 | 9.56E-05  |
| cell cycle         | MYC      | -2.33 | 1.12E-06 | 1.17E-05  |
| DDR                | MLH1     | -1.08 | 1.28E-06 | 1.23E-05  |
| DDR                | FANCG    | -1.24 | 1.20E-02 | 2.33E-02  |
| DDR                | FEN1     | -1.35 | 2.66E-04 | 8.48E-04  |
| DDR                | NLRP2    | -1.36 | 1.28E-07 | 2.46E-06  |
| DDR                | ATM      | -1.37 | 3.39E-05 | 1.50E-04  |
| DDR                | XPC      | -1.40 | 5.90E-05 | 2.39E-04  |
| DDR                | RAD51    | -1.41 | 2.78E-06 | 2.28E-05  |
| DDR                | FANCM    | -1.52 | 7.09E-07 | 8.16E-06  |
| DDR                | MSH2     | -1.53 | 2.55E-07 | 4.19E-06  |
| DDR                | BRCA1    | -1.56 | 4.89E-06 | 3.51E-05  |
| DDR                | BLM      | -1.65 | 4.80E-06 | 3.51E-05  |
| DDR                | ATR      | -2.20 | 2.24E-09 | 8.58E-08  |
| necrosis/autophagy | PARP1    | -1.11 | 2.75E-05 | 1.33E-04  |
| p38/JNK            | EGR1     | 6.61  | 7.23E-10 | 4.16E-08  |
| p38/JNK            | MAFF     | 6.29  | 1.21E-08 | 2.78E-07  |
| p38/JNK            | FOS      | 5.46  | 2.22E-05 | 1.16E-04  |
| p38/JNK            | ZFP36    | 4.58  | 2.02E-05 | 1.10E-04  |
| p38/JNK            | JUN      | 2.62  | 2.67E-03 | 6.67E-03  |
| p38/JNK            | OAS1     | 2.49  | 2.08E-04 | 7.04E-04  |
| p38/JNK            | PHLDA1   | 2.25  | 8.13E-05 | 3.12E-04  |
| p38/JNK            | KLf6     | 1.81  | 3.94E-07 | 5.67E-06  |
| ROS                | HMOX1    | 4.01  | 3.02E-03 | 6.93E-03  |
| ROS                | NQO1     | 1.88  | 1.93E-06 | 1.71E-05  |
| UPR/ER stress      | ATF3     | 5.89  | 2.87E-11 | 3.30E-09  |
| UPR/ER Stress      | PPP1R15A | 5.20  | 1.12E-04 | 4.16E-04  |
| UPR/ER Stress      | HERPUD1  | 1.98  | 4.90E-07 | 6.26E-06  |
| UPR/ER Stress      | HSPA5    | 1.40  | 1.07E-05 | 7.24E-05  |
| UPR/ER Stress      | ATF4     | 1.20  | 6.02E-05 | 2.39E-04  |

floating, low oxygen vs in vivo

| process          | ID        | logFC | P.Value  | adj.P.Val |
|------------------|-----------|-------|----------|-----------|
| apoptosis        | PMAIP1    | 2.99  | 2.80E-10 | 1.61E-08  |
| apoptosis        | TNFRSF10B | 1.22  | 1.52E-04 | 4.61E-04  |
| apoptosis        | MCL1      | 1.21  | 3.36E-03 | 6.43E-03  |
| apoptosis        | BNIP3     | 1.00  | 2.19E-03 | 4.50E-03  |
| apoptosis        | ZMAT3     | -1.10 | 2.75E-04 | 7.72E-04  |
| apoptosis        | TNFRSF10A | -1.31 | 7.15E-05 | 2.42E-04  |
| apoptosis        | PIDD      | -1.58 | 1.06E-02 | 1.84E-02  |
| cell cycle       | CDKN1B    | 1.93  | 1.59E-05 | 6.31E-05  |
| cell cycle       | CDKN1A    | 1.14  | 3.49E-03 | 6.58E-03  |
| cell cycle       | TP73      | -1.09 | 2.73E-02 | 4.19E-02  |
| cell cycle       | CCNA2     | -1.10 | 1.77E-03 | 3.83E-03  |
| cell cycle       | CDC25C    | -1.12 | 3.53E-04 | 9.68E-04  |
| cell cycle       | RPA1      | -1.13 | 1.26E-05 | 5.54E-05  |
| cell cycle       | CDK1      | -1.25 | 3.93E-06 | 2.15E-05  |
| cell cycle       | BTG2      | -1.26 | 2.39E-03 | 4.82E-03  |
| cell cycle       | TP53      | -1.78 | 5.57E-06 | 2.67E-05  |
| cell cycle       | PCNA      | -1.87 | 1.60E-07 | 1.53E-06  |
| cell cycle       | TERT      | -2.60 | 1.59E-02 | 2.65E-02  |
| cell cycle       | MVC       | -2.99 | 6.88E-08 | 7.92E-07  |
| DDR              | XRCC1     | -1.90 | 4.78E-03 | 8.60E-03  |
| DDR              | DDR2      | -1.21 | 5.58E-05 | 1.94E-04  |
| DDR              | ATM       | -1.26 | 7.61E-05 | 2.50E-04  |
| DDR              | SESN1     | -1.29 | 4.54E-06 | 2.27E-05  |
| DDR              | MLH1      | -1.43 | 5.68E-08 | 7.54E-07  |
| DDR              | XRCC3     | -1.44 | 2.69E-02 | 4.18E-02  |
| DDR              | RAD51     | -1.45 | 2.09E-06 | 1.34E-05  |
| DDR              | BLM       | -1.49 | 1.39E-05 | 5.70E-05  |
| DDR              | FANCM     | -1.54 | 6.12E-07 | 5.41E-06  |
| DDR              | BRCA1     | -1.65 | 2.83E-06 | 1.63E-05  |
| DDR              | MSH2      | -1.67 | 9.37E-08 | 9.80E-07  |
| DDR              | FANCG     | -1.79 | 1.04E-03 | 2.43E-03  |
| DDR              | NLRP2     | -1.98 | 1.69E-09 | 3.88E-08  |
| DDR              | FEN1      | -1.99 | 6.66E-06 | 3.06E-05  |
| DDR              | XPC       | -2.02 | 1.45E-06 | 1.04E-05  |
| DDR              | ATR       | -2.43 | 7.01E-10 | 2.01E-08  |
| necrosis/autoph. | PARP1     | -1.52 | 1.13E-06 | 8.68E-06  |
| necrosis/autoph. | RIPK1     | -1.97 | 2.75E-06 | 1.63E-05  |
| p38/JNK          | EGR1      | 6.89  | 4.35E-10 | 1.67E-08  |
| p38/JNK          | MAFF      | 6.47  | 8.93E-09 | 1.47E-07  |
| p38/JNK          | FOS       | 5.96  | 1.85E-05 | 6.84E-05  |
| p38/JNK          | ZFP36     | 4.78  | 1.30E-05 | 5.54E-05  |
| p38/JNK          | OAS1      | 3.23  | 8.06E-05 | 2.50E-04  |
| p38/JNK          | PHLDA1    | 2.62  | 1.90E-05 | 6.84E-05  |
| p38/JNK          | KLf6      | 2.14  | 5.90E-08 | 7.54E-07  |
| p38/JNK          | JUN       | 2.02  | 1.32E-02 | 2.27E-02  |
| ROS              | HMOX1     | 3.36  | 9.14E-03 | 1.62E-02  |
| UPR/ER stress    | ATF3      | 6.38  | 1.16E-11 | 1.33E-09  |
| UPR/ER Stress    | PPP1R15A  | 4.18  | 8.25E-04 | 1.98E-03  |
| UPR/ER Stress    | HERPUD1   | 2.86  | 7.72E-09 | 1.47E-07  |
| UPR/ER Stress    | HSPA5     | 1.77  | 9.57E-07 | 7.86E-06  |
| UPR/ER Stress    | ATF4      | 1.57  | 4.16E-06 | 2.18E-05  |
| UPR/ER Stress    | XBP1(U)   | -1.04 | 2.16E-04 | 6.38E-04  |
| UPR/ER Stress    | EDEM2     | -1.07 | 1.73E-05 | 6.63E-05  |

Red indicates significantly up-regulated genes, and green indicates down-regulated genes (p < 0.05). The different stress pathways are indicated by different colors.

Supplementary Table 2: Part 4: The fold-changes in transcriptional biomarkers observed in slices from MCF-7 breast CDX after cultivation.

**MCF-7 breast CDX**

filter, atmospheric oxygen vs in vivo

| process       | ID       | logFC | P.Value  | adj.P.Val |
|---------------|----------|-------|----------|-----------|
| apoptosis     | HRK      | 1.31  | 2.78E-03 | 8.42E-03  |
| apoptosis     | BID      | -1.02 | 3.72E-03 | 1.07E-02  |
| apoptosis     | BCL2L1   | -1.17 | 6.78E-05 | 4.33E-04  |
| apoptosis     | PIDD     | -1.99 | 4.15E-03 | 1.14E-02  |
| apoptosis     | TP53AIP1 | -2.10 | 6.97E-06 | 8.02E-05  |
| cell cycle    | CCNB1    | -1.03 | 1.22E-04 | 7.00E-04  |
| cell cycle    | CHEK1    | -1.03 | 1.49E-05 | 1.32E-04  |
| cell cycle    | BTG2     | -1.08 | 1.24E-02 | 2.91E-02  |
| cell cycle    | CDC25C   | -1.22 | 2.41E-07 | 4.61E-06  |
| cell cycle    | CCNA2    | -1.32 | 2.74E-05 | 1.97E-04  |
| cell cycle    | TERT     | -1.35 | 8.48E-03 | 2.17E-02  |
| cell cycle    | SFN      | -1.95 | 7.43E-05 | 4.50E-04  |
| cell cycle    | TP63     | -2.81 | 1.84E-08 | 1.77E-06  |
| cell cycle    | TAp73    | -2.89 | 5.49E-05 | 3.71E-04  |
| cell cycle    | TP73     | -3.28 | 2.81E-07 | 4.61E-06  |
| DDR           | ATR      | 1.07  | 7.60E-04 | 2.91E-03  |
| DDR           | XPA      | -1.05 | 2.11E-04 | 1.16E-03  |
| DDR           | BRCA1    | -1.19 | 8.44E-08 | 2.43E-06  |
| DDR           | BLM      | -1.47 | 1.88E-07 | 4.32E-06  |
| DDR           | DDB2     | -1.49 | 4.61E-08 | 1.77E-06  |
| DDR           | RAD51    | -1.76 | 3.18E-04 | 1.52E-03  |
| p38/JNK       | OAS1     | -1.06 | 4.07E-03 | 1.14E-02  |
| p38/JNK       | EGR1     | -2.28 | 9.28E-06 | 8.89E-05  |
| ROS           | HMOX1    | 1.77  | 9.44E-07 | 1.36E-05  |
| ROS           | SQSTM1   | 1.02  | 6.85E-04 | 2.81E-03  |
| ROS           | SOD2     | -1.15 | 4.34E-06 | 5.55E-05  |
| UPR/ER Stress | HERPUD1  | 2.08  | 3.40E-08 | 1.77E-06  |
| UPR/ER Stress | HSPA5    | 1.40  | 2.61E-05 | 1.97E-04  |

filter, low oxygen vs in vivo

| process       | ID       | logFC | P.Value  | adj.P.Val |
|---------------|----------|-------|----------|-----------|
| apoptosis     | TP53AIP1 | -1.36 | 9.84E-04 | 4.92E-03  |
| cell cycle    | CCNB1    | -1.20 | 2.00E-05 | 1.92E-04  |
| cell cycle    | CCNA2    | -1.37 | 1.84E-05 | 1.92E-04  |
| cell cycle    | TERT     | -1.41 | 6.32E-03 | 2.20E-02  |
| cell cycle    | SFN      | -1.51 | 1.07E-03 | 5.12E-03  |
| cell cycle    | CDC25C   | -1.56 | 3.93E-09 | 4.52E-07  |
| cell cycle    | TAp73    | -1.73 | 7.20E-03 | 2.44E-02  |
| cell cycle    | TP73     | -1.91 | 3.35E-04 | 1.92E-03  |
| cell cycle    | TP63     | -2.10 | 1.89E-06 | 2.72E-05  |
| DDR           | BRCA1    | -1.03 | 8.42E-07 | 1.61E-05  |
| DDR           | BLM      | -1.27 | 1.76E-06 | 2.72E-05  |
| DDR           | RAD51    | -1.44 | 2.00E-05 | 1.92E-04  |
| DDR           | DDB2     | -1.54 | 2.74E-08 | 7.88E-07  |
| p38/JNK       | EGR1     | -2.10 | 2.69E-05 | 2.38E-04  |
| ROS           | HIF1A    | 1.18  | 1.97E-03 | 8.40E-03  |
| ROS           | SOD1     | -1.02 | 5.06E-05 | 3.64E-04  |
| ROS           | SOD2     | -1.64 | 1.59E-08 | 7.88E-07  |
| UPR/ER Stress | HERPUD1  | 2.12  | 2.52E-08 | 7.88E-07  |
| UPR/ER Stress | HSPA5    | 1.58  | 4.83E-06 | 6.17E-05  |
| UPR/ER Stress | DNAJC3   | 1.35  | 4.38E-08 | 1.01E-06  |

Red indicates significantly up-regulated genes, and green indicates down-regulated genes (p < 0.05).  
The different stress pathways are indicated by different colors.

## References:

1. Johnson, R. A. Transcriptional Repression by p53 through Direct Binding to a Novel DNA Element. *J. Biol. Chem.* **276**, 27716–27720 (2001).
2. Wu, M. *et al.* AMID is a p53-inducible gene downregulated in tumors. *Oncogene* **23**, 6815–6819 (2004).
3. Arakawa, T., Nakamura, M., Yoshimoto, T. & Yamamoto, S. The transcriptional regulation of human arachidonate 12-lipoxygenase gene by NF kappa B/Rel. *FEBS Lett.* **363**, 105–110 (1995).
4. Robles, A. I., Bemmels, N. A., Foraker, A. B. & Harris, C. C. APAF-1 is a transcriptional target of p53 in DNA damage-induced apoptosis. *Cancer Res.* **61**, 6660–6664 (2001).
5. Lv, G. *et al.* MicroRNA-451 regulates activating transcription factor 2 expression and inhibits liver cancer cell migration. *Oncol. Rep.* (2014). doi:10.3892/or.2014.3296
6. Zhang, C. *et al.* Transcriptional activation of the human stress-inducible transcriptional repressor ATF3 gene promoter by p53. *Biochem. Biophys. Res. Commun.* **297**, 1302–1310 (2002).
7. Kim, I., Xu, W. & Reed, J. C. Cell death and endoplasmic reticulum stress: disease relevance and therapeutic opportunities. *Nat. Rev. Drug Discov.* **7**, 1013–1030 (2008).
8. Adachi, Y. *et al.* ATF6 Is a Transcription Factor Specializing in the Regulation of Quality Control Proteins in the Endoplasmic Reticulum. *Cell Struct. Funct.* **33**, 75–89 (2008).
9. Verfaillie, T., Salazar, M., Velasco, G. & Agostinis, P. Linking ER Stress to Autophagy: Potential Implications for Cancer Therapy. *Int. J. Cell Biol.* **2010**, e930509 (2010).
10. Maskey, D. *et al.* ATG5 is induced by DNA-damaging agents and promotes mitotic catastrophe independent of autophagy. *Nat. Commun.* **4**, (2013).
11. Comincini, S. *et al.* microRNA-17 regulates the expression of ATG7 and modulates the autophagy process, improving the sensitivity to temozolomide and low-dose ionizing radiation treatments in human glioblastoma cells. *Cancer Biol. Ther.* **14**, 574–586 (2013).
12. Moiola, C. *et al.* Dynamic coregulatory complex containing BRCA1, E2F1 and CtIP controls ATM transcription. *Cell. Physiol. Biochem. Int. J. Exp. Cell. Physiol. Biochem. Pharmacol.* **30**, 596–608 (2012).
13. Wang, X. *et al.* HOXC9 directly regulates distinct sets of genes to coordinate diverse cellular processes during neuronal differentiation. *BMC Genomics* **14**, 830 (2013).
14. Graupner, V. *et al.* Differential regulation of the proapoptotic multidomain protein Bak by p53 and p73 at the promoter level. *Cell Death Differ.* **18**, 1130–1139 (2011).
15. Catz, S. D. & Johnson, J. L. Transcriptional regulation of bcl-2 by nuclear factor kappa B and its significance in prostate cancer. *Oncogene* **20**, 7342–7351 (2001).
16. Riley, T., Sontag, E., Chen, P. & Levine, A. Transcriptional control of human p53-regulated genes. *Nat. Rev. Mol. Cell Biol.* **9**, 402–412 (2008).

17. Wei, C.-L. *et al.* A global map of p53 transcription-factor binding sites in the human genome. *Cell* **124**, 207–219 (2006).
18. Grumont, R. J., Rourke, I. J. & Gerondakis, S. Rel-dependent induction of A1 transcription is required to protect B cells from antigen receptor ligation-induced apoptosis. *Genes Dev.* **13**, 400–411 (1999).
19. Lee, R. M., Gillet, G., Burnside, J., Thomas, S. J. & Neiman, P. Role of Nr13 in regulation of programmed cell death in the bursa of Fabricius. *Genes Dev.* **13**, 718–728 (1999).
20. Wang, Z., Zhang, B., Yang, L., Ding, J. & Ding, H.-F. Constitutive production of NF-kappaB2 p52 is not tumorigenic but predisposes mice to inflammatory autoimmune disease by repressing Bim expression. *J. Biol. Chem.* **283**, 10698–10706 (2008).
21. Miled, C., Pontoglio, M., Garbay, S., Yaniv, M. & Weitzman, J. B. A genomic map of p53 binding sites identifies novel p53 targets involved in an apoptotic network. *Cancer Res.* **65**, 5096–5104 (2005).
22. Copetti, T., Bertoli, C., Dalla, E., Demarchi, F. & Schneider, C. p65/RelA modulates BECN1 transcription and autophagy. *Mol. Cell. Biol.* **29**, 2594–2608 (2009).
23. Sax, J. K. *et al.* BID regulation by p53 contributes to chemosensitivity. *Nat. Cell Biol.* **4**, 842–849 (2002).
24. Chinnadurai, G., Vijayalingam, S. & Rashmi, R. BIK, the founding member of the BH3-only family proteins: mechanisms of cell death and role in cancer and pathogenic processes. *Oncogene* **27 Suppl 1**, S20–29 (2008).
25. Stehlik, C. *et al.* Nuclear factor (NF)-kappaB-regulated X-chromosome-linked iap gene expression protects endothelial cells from tumor necrosis factor alpha-induced apoptosis. *J. Exp. Med.* **188**, 211–216 (1998).
26. Slupianek, A. *et al.* BLM helicase is activated in BCR/ABL leukemia cells to modulate responses to cisplatin. *Oncogene* **24**, 3914–3922 (2005).
27. Baetz, D. *et al.* Nuclear factor-kappaB-mediated cell survival involves transcriptional silencing of the mitochondrial death gene BNIP3 in ventricular myocytes. *Circulation* **112**, 3777–3785 (2005).
28. Yakovlev, A. G. *et al.* BOK and NOXA are essential mediators of p53-dependent apoptosis. *J. Biol. Chem.* **279**, 28367–28374 (2004).
29. Thakur, S. *et al.* Regulation of BRCA1 Transcription by Specific Single-Stranded DNA Binding Factors. *Mol. Cell. Biol.* **23**, 3774–3787 (2003).
30. Rivera, A., Mavila, A., Bayless, K. J., Davis, G. E. & Maxwell, S. A. Cyclin A1 is a p53-induced gene that mediates apoptosis, G2/M arrest, and mitotic catastrophe in renal, ovarian, and lung carcinoma cells. *Cell. Mol. Life Sci. CMLS* **63**, 1425–1439 (2006).
31. Innocente, S. A., Abrahamson, J. L., Cogswell, J. P. & Lee, J. M. p53 regulates a G2 checkpoint through cyclin B1. *Proc. Natl. Acad. Sci. U. S. A.* **96**, 2147–2152 (1999).



32. Okamoto, K. & Beach, D. Cyclin G is a transcriptional target of the p53 tumor suppressor protein. *EMBO J.* **13**, 4816–4822 (1994).
33. Mori, T. *et al.* Cyclin K as a direct transcriptional target of the p53 tumor suppressor. *Neoplasia N. Y. N* **4**, 268–274 (2002).
34. St Clair, S. *et al.* DNA damage-induced downregulation of Cdc25C is mediated by p53 via two independent mechanisms: one involves direct binding to the cdc25C promoter. *Mol. Cell* **16**, 725–736 (2004).
35. Yun, J. *et al.* p53 negatively regulates cdc2 transcription via the CCAAT-binding NF-Y transcription factor. *J. Biol. Chem.* **274**, 29677–29682 (1999).
36. Hinata, K., Gervin, A. M., Jennifer Zhang, Y. & Khavari, P. A. Divergent gene regulation and growth effects by NF-kappa B in epithelial and mesenchymal cells of human skin. *Oncogene* **22**, 1955–1964 (2003).
37. Chu, I. M., Hengst, L. & Slingerland, J. M. The Cdk inhibitor p27 in human cancer: prognostic potential and relevance to anticancer therapy. *Nat. Rev. Cancer* **8**, 253–267 (2008).
38. Kreuz, S., Siegmund, D., Scheurich, P. & Wajant, H. NF-kappaB inducers upregulate cFLIP, a cycloheximide-sensitive inhibitor of death receptor signaling. *Mol. Cell. Biol.* **21**, 3964–3973 (2001).
39. Matsui, T. *et al.* Negative regulation of Chk2 expression by p53 is dependent on the CCAAT-binding transcription factor NF-Y. *J. Biol. Chem.* **279**, 25093–25100 (2004).
40. Samali, A., FitzGerald, U., Deegan, S. & Gupta, S. Methods for Monitoring Endoplasmic Reticulum Stress and the Unfolded Protein Response. *Int. J. Cell Biol.* **2010**, e830307 (2010).
41. Olivari, S., Galli, C., Alanen, H., Ruddock, L. & Molinari, M. A novel stress-induced EDEM variant regulating endoplasmic reticulum-associated glycoprotein degradation. *J. Biol. Chem.* **280**, 2424–2428 (2005).
42. Nishi, H. *et al.* Analysis of the epidermal growth factor receptor promoter: the effect of nuclear factor-kappaB. *Int. J. Mol. Med.* **11**, 49–55 (2003).
43. Zhou, A., Scoggin, S., Gaynor, R. B. & Williams, N. S. Identification of NF-kappa B-regulated genes induced by TNFalpha utilizing expression profiling and RNA interference. *Oncogene* **22**, 2054–2064 (2003).
44. Ferreiro, I. *et al.* Whole genome analysis of p38 SAPK-mediated gene expression upon stress. *BMC Genomics* **11**, 144 (2010).
45. Yan, Q.-W. *et al.* MZF1 possesses a repressively regulatory function in ERCC1 expression. *Biochem. Pharmacol.* **71**, 761–771 (2006).
46. Tanaka, K., Oda, N., Iwasaka, C., Abe, M. & Sato, Y. Induction of Ets-1 in endothelial cells during reendothelialization after denuding injury. *J. Cell. Physiol.* **176**, 235–244 (1998).

47. Li, N., Zhang, F., Li, S. & Zhou, S. Epigenetic silencing of MicroRNA-503 regulates FANCA expression in non-small cell lung cancer cell. *Biochem. Biophys. Res. Commun.* **444**, 611–616 (2014).
48. Scanlon, S. E. & Glazer, P. M. Hypoxic Stress Facilitates Acute Activation and Chronic Downregulation of Fanconi Anemia Proteins. *Mol. Cancer Res. MCR* (2014). doi:10.1158/1541-7786.MCR-13-0628
49. Tsai, Y.-S. *et al.* Areca nut induces miR-23a and inhibits repair of DNA double-strand breaks by targeting FANCG. *Toxicol. Sci. Off. J. Soc. Toxicol.* **123**, 480–490 (2011).
50. Chan, H., Bartos, D. P. & Owen-Schaub, L. B. Activation-dependent transcriptional regulation of the human Fas promoter requires NF-kappaB p50-p65 recruitment. *Mol. Cell. Biol.* **19**, 2098–2108 (1999).
51. Matsui, K., Fine, A., Zhu, B., Marshak-Rothstein, A. & Ju, S. T. Identification of two NF-kappa B sites in mouse CD95 ligand (Fas ligand) promoter: functional analysis in T cell hybridoma. *J. Immunol. Baltim. Md 1950* **161**, 3469–3473 (1998).
52. Christmann, M., Tomicic, M. T., Origer, J. & Kaina, B. Fen1 is induced p53 dependently and involved in the recovery from UV-light-induced replication inhibition. *Oncogene* **24**, 8304–8313 (2005).
53. Kwak, E. L., Larochelle, D. A., Beaumont, C., Torti, S. V. & Torti, F. M. Role for NF-kappa B in the regulation of ferritin H by tumor necrosis factor-alpha. *J. Biol. Chem.* **270**, 15285–15293 (1995).
54. Xia, C., Hu, J., Ketterer, B. & Taylor, J. B. The organization of the human GSTP1-1 gene promoter and its response to retinoic acid and cellular redox status. *Biochem. J.* **313 ( Pt 1)**, 155–161 (1996).
55. Harrison, P. M. & Farzaneh, F. Regulation of HGF/SF gene expression in MRC-5 cells by N-acetylcysteine. *Biochem. Biophys. Res. Commun.* **279**, 108–115 (2000).
56. Bonello, S. *et al.* Reactive oxygen species activate the HIF-1alpha promoter via a functional NFkappaB site. *Arterioscler. Thromb. Vasc. Biol.* **27**, 755–761 (2007).
57. Liu, Y., Bernauer, A. M., Yingling, C. M. & Belinsky, S. A. HIF1 $\alpha$  regulated expression of XPA contributes to cisplatin resistance in lung cancer. *Carcinogenesis* **33**, 1187–1192 (2012).
58. Lavrovsky, Y., Schwartzman, M. L., Levere, R. D., Kappas, A. & Abraham, N. G. Identification of binding sites for transcription factors NF-kappa B and AP-2 in the promoter region of the human heme oxygenase 1 gene. *Proc. Natl. Acad. Sci. U. S. A.* **91**, 5987–5991 (1994).
59. Imaizumi, K. *et al.* Molecular cloning of a novel polypeptide, DP5, induced during programmed neuronal death. *J. Biol. Chem.* **272**, 18842–18848 (1997).
60. Ammirante, M. *et al.* The activity of hsp90 alpha promoter is regulated by NF-kappa B transcription factors. *Oncogene* **27**, 1175–1178 (2008).
61. Wu, M. X., Ao, Z., Prasad, K. V., Wu, R. & Schlossman, S. F. IEX-1L, an apoptosis inhibitor involved in NF-kappaB-mediated cell survival. *Science* **281**, 998–1001 (1998).

62. Whitmarsh, A. J. A central role for p38 MAPK in the early transcriptional response to stress. *BMC Biol.* **8**, 47 (2010).
63. Tiwari, N. *et al.* Klf4 is a transcriptional regulator of genes critical for EMT, including Jnk1 (Mapk8). *PLoS One* **8**, e57329 (2013).
64. Juin, P., Geneste, O., Gautier, F., Depil, S. & Campone, M. Decoding and unlocking the BCL-2 dependency of cancer cells. *Nat. Rev. Cancer* **13**, 455–465 (2013).
65. Duyao, M. P., Buckler, A. J. & Sonenshein, G. E. Interaction of an NF-kappa B-like factor with a site upstream of the c-myc promoter. *Proc. Natl. Acad. Sci. U. S. A.* **87**, 4727–4731 (1990).
66. Fontalba, A., Gutierrez, O. & Fernandez-Luna, J. L. NLRP2, an inhibitor of the NF-kappaB pathway, is transcriptionally activated by NF-kappaB and exhibits a nonfunctional allelic variant. *J. Immunol. Baltim. Md 1950* **179**, 8519–8524 (2007).
67. Geller, D. A. *et al.* Cytokine induction of interferon regulatory factor-1 in hepatocytes. *Surgery* **114**, 235–242 (1993).
68. Yao, K. S. & O'Dwyer, P. J. Involvement of NF-kappa B in the induction of NAD(P)H:quinone oxidoreductase (DT-diaphorase) by hypoxia, oltipraz and mitomycin C. *Biochem. Pharmacol.* **49**, 275–282 (1995).
69. Lin, Y., Ma, W. & Benchimol, S. Pidd, a new death-domain-containing protein, is induced by p53 and promotes apoptosis. *Nat. Genet.* **26**, 122–127 (2000).
70. Acosta-Alvear, D. *et al.* XBP1 controls diverse cell type- and condition-specific transcriptional regulatory networks. *Mol. Cell* **27**, 53–66 (2007).
71. Marciniak, S. J. *et al.* CHOP induces death by promoting protein synthesis and oxidation in the stressed endoplasmic reticulum. *Genes Dev.* **18**, 3066–3077 (2004).
72. Kim, Y.-J. *et al.* Human prx1 gene is a target of Nrf2 and is up-regulated by hypoxia/reoxygenation: implication to tumor biology. *Cancer Res.* **67**, 546–554 (2007).
73. Ardolino, M. *et al.* DNAM-1 ligand expression on Ag-stimulated T lymphocytes is mediated by ROS-dependent activation of DNA-damage response: relevance for NK-T cell interaction. *Blood* **117**, 4778–4786 (2011).
74. Nakano, K., Bálint, E., Ashcroft, M. & Vousden, K. H. A ribonucleotide reductase gene is a transcriptional target of p53 and p73. *Oncogene* **19**, 4283–4289 (2000).
75. Lee, M. H., Mabb, A. M., Gill, G. B., Yeh, E. T. H. & Miyamoto, S. NF-κB induction of the SUMO protease SENP2: A negative feedback loop to attenuate cell survival response to genotoxic stress. *Mol. Cell* **43**, 180–191 (2011).
76. Hermeking, H. *et al.* 14-3-3 sigma is a p53-regulated inhibitor of G2/M progression. *Mol. Cell* **1**, 3–11 (1997).

77. Bourdon, J.-C., Renzing, J., Robertson, P. L., Fernandes, K. N. & Lane, D. P. Scotin, a novel p53-inducible proapoptotic protein located in the ER and the nuclear membrane. *J. Cell Biol.* **158**, 235–246 (2002).
78. Milner, J. Cellular regulation of SIRT1. *Curr. Pharm. Des.* **15**, 39–44 (2009).
79. Rojo, A. I., Salinas, M., Martín, D., Perona, R. & Cuadrado, A. Regulation of Cu/Zn-superoxide dismutase expression via the phosphatidylinositol 3 kinase/Akt pathway and nuclear factor-kappaB. *J. Neurosci. Off. J. Soc. Neurosci.* **24**, 7324–7334 (2004).
80. Xu, Y. *et al.* Mutations in the promoter reveal a cause for the reduced expression of the human manganese superoxide dismutase gene in cancer cells. *Oncogene* **18**, 93–102 (1999).
81. Jain, A. *et al.* p62/SQSTM1 is a target gene for transcription factor NRF2 and creates a positive feedback loop by inducing antioxidant response element-driven gene transcription. *J. Biol. Chem.* **285**, 22576–22591 (2010).
82. Chen, X., Zheng, Y., Zhu, J., Jiang, J. & Wang, J. p73 is transcriptionally regulated by DNA damage, p53, and p73. *Oncogene* **20**, 769–774 (2001).
83. Yin, L., Hubbard, A. K. & Giardina, C. NF-kappa B regulates transcription of the mouse telomerase catalytic subunit. *J. Biol. Chem.* **275**, 36671–36675 (2000).
84. Liu, X., Yue, P., Khuri, F. R. & Sun, S.-Y. p53 upregulates death receptor 4 expression through an intronic p53 binding site. *Cancer Res.* **64**, 5078–5083 (2004).
85. Liu, X., Yue, P., Khuri, F. R. & Sun, S.-Y. Decoy receptor 2 (DcR2) is a p53 target gene and regulates chemosensitivity. *Cancer Res.* **65**, 9169–9175 (2005).
86. Wu, H. & Lozano, G. NF-kappa B activation of p53. A potential mechanism for suppressing cell growth in response to stress. *J. Biol. Chem.* **269**, 20067–20074 (1994).
87. O'Prey, J. *et al.* p53-mediated induction of Noxa and p53AIP1 requires NFkappaB. *Cell Cycle Georget. Tex* **9**, 947–952 (2010).
88. Schwenzer, R. *et al.* The human tumor necrosis factor (TNF) receptor-associated factor 1 gene (TRAF1) is up-regulated by cytokines of the TNF ligand family and modulates TNF-induced activation of NF-kappaB and c-Jun N-terminal kinase. *J. Biol. Chem.* **274**, 19368–19374 (1999).
89. Wang, C. Y., Mayo, M. W., Korneluk, R. G., Goeddel, D. V. & Baldwin, A. S. NF-kappaB antiapoptosis: induction of TRAF1 and TRAF2 and c-IAP1 and c-IAP2 to suppress caspase-8 activation. *Science* **281**, 1680–1683 (1998).
90. Hawkes, H.-J. K., Karlenius, T. C. & Tonissen, K. F. Regulation of the human thioredoxin gene promoter and its key substrates: a study of functional and putative regulatory elements. *Biochim. Biophys. Acta* **1840**, 303–314 (2014).
91. Byrd, A. E. & Brewer, J. W. Intricately Regulated: A Cellular Toolbox for Fine-Tuning XBP1 Expression and Activity. *Cells* **1**, 738–753 (2012).

92. Turner, D. J. *et al.* Bile salts induce resistance to apoptosis through NF-kappaB-mediated XIAP expression. *Ann. Surg.* **245**, 415–425 (2007).
93. Chen, D., Yu, Z., Zhu, Z. & Lopez, C. D. E2F1 regulates the base excision repair gene XRCC1 and promotes DNA repair. *J. Biol. Chem.* **283**, 15381–15389 (2008).
94. Yanagisawa, T., Urade, M., Yamamoto, Y. & Furuyama, J. Increased expression of human DNA repair genes, XRCC1, XRCC3 and RAD51, in radioresistant human KB carcinoma cell line N10. *Oral Oncol.* **34**, 524–528 (1998).
95. Hellborg, F. *et al.* Human wig-1, a p53 target gene that encodes a growth inhibitory zinc finger protein. *Oncogene* **20**, 5466–5474 (2001).
